# Supplementary material
Source: MDPI journal article supplement (https://www.mdpi.com/search?q=cancers-12-02348)
Supplement: s001 [file cancers-12-02348-s001.pdf]

Review

# The Full Blood Count Blood Test for Colorectal Cancer Detection: A Systematic Review, Meta-Analysis, and Critical Appraisal

Pradeep S. Virdee, Ioana Marian, Anita Mansouri, Leena Elhussein, Shona Kirtley, Tim Holt and Jacqueline Birks

## 1. Description of the full blood count

**Table S1.** Description of each component of the full blood count blood test

| Full blood count component                              | Conventional units                               | Description/purpose                                                                                                                                             |
|---------------------------------------------------------|--------------------------------------------------|-----------------------------------------------------------------------------------------------------------------------------------------------------------------|
| Red blood cell count <sup>1</sup>                       | 10 <sup>12</sup> per litre (10 <sup>12</sup> /L) | The number of red blood cells in the blood. Lower levels can be associated with blood less. Each red blood cell contains levels of haemoglobin.                 |
| White blood cell count <sup>1</sup>                     | 10 <sup>9</sup> per litre (10 <sup>9</sup> /L)   | The number of white blood cells in the blood. They are of the immune system and involved in protecting the body against disease.                                |
| Haemoglobin <sup>1</sup>                                | Grams per decilitre (g/dL)                       | Carries oxygen around the body and is found in red blood cells                                                                                                  |
| Haematocrit/packed cell volume <sup>2</sup>             | Percentage, i.e. as litres per litre (%)         | Proportion of blood that is occupied by the red cells. A possible alternative for detecting anaemia.                                                            |
| Mean corpuscular volume <sup>2</sup>                    | Femtolitre (f/L)                                 | Average size of red blood cells. Calculated as haematocrit (%) divided by the number of red blood cells (10 <sup>12</sup> /L)                                   |
| Mean corpuscular haemoglobin <sup>2</sup>               | Pictograms (pg)                                  | Average of amount of haemoglobin that is in each red blood cell. Calculated as haemoglobin (g/dL) divided by the red blood cell count (10 <sup>12</sup> /L)     |
| Mean corpuscular haemoglobin concentration <sup>2</sup> | Grams per decilitre (g/dL)                       | Average of amount of haemoglobin in individual cells based on the volume of red blood cells. Calculated as haemoglobin (g/dL) divided by the haematocrit (%)    |
| Red cell distribution width <sup>2</sup>                | A coefficient, as opposed to count               | A measure of the amount of variation in the size of red cells; the higher, the more variation.                                                                  |
| Platelet count <sup>1</sup>                             | 10 <sup>9</sup> per litre (10 <sup>9</sup> /L)   | Not a cell, but instead fragments of cytoplasm. They bind to sites of damaged blood vessels, e.g. cuts, and clump to form a blood clot to help prevent bleeding |
| Mean platelet volume <sup>2</sup>                       | Femtolitre (f/L)                                 | Average size of platelets                                                                                                                                       |
| Basophil count <sup>1</sup>                             | 10 <sup>9</sup> per litre (10 <sup>9</sup> /L)   | A type of white blood cell. Controls hypersensitivity reactions, allergic and inflammatory responses and fights parasitic infections                            |

|                               |                                                |                                                                                                                                    |
|-------------------------------|------------------------------------------------|------------------------------------------------------------------------------------------------------------------------------------|
| Basophil % <sup>2</sup>       | Percentage                                     | Basophil count divided by the number of white blood cells                                                                          |
| Eosinophil count <sup>1</sup> | 10 <sup>9</sup> per litre (10 <sup>9</sup> /L) | A type of white blood cell. Fights infection, including parasitic; has a role in allergic responses                                |
| Eosinophil % <sup>2</sup>     | Percentage                                     | Eosinophil count divided by the number of white blood cells                                                                        |
| Lymphocyte count <sup>1</sup> | 10 <sup>9</sup> per litre (10 <sup>9</sup> /L) | A type of white blood cell. Mediates immune responses                                                                              |
| Lymphocyte % <sup>2</sup>     | Percentage                                     | Lymphocyte count divided by the number of white blood cells                                                                        |
| Monocyte count <sup>1</sup>   | 10 <sup>9</sup> per litre (10 <sup>9</sup> /L) | A type of white blood cell. Kills micro-organisms including mycobacteria and fungi; presents antigen to cells of the immune system |
| Monocyte % <sup>2</sup>       | Percentage                                     | Monocyte count divided by the number of white blood cells                                                                          |
| Neutrophil count <sup>1</sup> | 10 <sup>9</sup> per litre (10 <sup>9</sup> /L) | A type of white blood cell. Fights infection                                                                                       |
| Neutrophil % <sup>2</sup>     | Percentage                                     | Neutrophil count divided by the number of white blood cells                                                                        |

<sup>1</sup>This component is measured directly from the blood sample. <sup>2</sup>This component is derived using mathematical formulae programmed into the analyser and describes at least one measured component

## 2. Final search strategy

### Scheme S1. Final search strategy per database

#### MEDLINE

Database and platform: Medline (Ovid MEDLINE® Epub Ahead of Print, In-Process & Other Non-Indexed Citations, Ovid MEDLINE® Daily and Ovid MEDLINE®) 1946 to present. Search date: 3 September 2019.

1. Colonic Neoplasms/bl [Blood]
2. Colonic Neoplasms/di [Diagnosis]
3. Colonic Neoplasms/ep [Epidemiology]
4. Colorectal Neoplasms/di [Diagnosis]
5. Colorectal Neoplasms/ep [Epidemiology]
6. Colorectal Neoplasms/bl [Blood]
7. Rectal Neoplasms/bl [Blood]
8. Rectal Neoplasms/di [Diagnosis]
9. Rectal Neoplasms/ep [Epidemiology]
10. Adenomatous Polyposis Coli/
11. Sigmoid Neoplasms/
12. Colorectal Neoplasms, Hereditary Nonpolyposis/
13. ((colorectal or bowel or colon or colonic or rectal or rectum) adj3 (cancer\$ or carcinoma\$ or adenoma\$ or neoplas\$ or metasta\$ or carcinogen\$ or tumour\$ or tumor\$ or malignan\$ or adenocarcinoma\$)).ti,ab,kw.
14. or/1-13
15. exp Blood Cell Count/
16. exp Hemoglobins/
17. Blood Platelets/

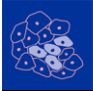

18. Neutrophils/
19. Basophils/
20. Eosinophils/
21. Lymphocytes/
22. Monocytes/
23. Occult Blood/
24. Thrombocytosis/
25. Leukocytosis/
26. Lymphocytosis/
27. Eosinophilia/
28. Anemia/
29. Leukopenia/
30. Neutropenia/
31. Lymphopenia/
32. Thrombocytopenia/
33. Polycythemia/
34. Erythrocytes/
35. Leukocytes/
36. Pancytopenia/
37. ((blood or platelet) adj2 count\$).ti,ab,kw.
38. (CBC or FBC).ti,ab,kw.
39. (blood adj2 exam\$).ti,ab,kw.
40. (haematolog\$ or hematolog\$ or haemoglobin or hemoglobin or haematocrit or hematocrit).ti,ab,kw.
41. ((red or white) adj1 blood adj1 cell\$).ti,ab,kw.
42. (mean adj1 (platelet or corpuscular) adj1 volume\$).ti,ab,kw.
43. (mean adj1 corpuscular adj1 (haemoglobin or hemoglobin)).ti,ab,kw.
44. (platelet\$ or basophil or basophils or eosinophil or eosinophils or lymphocyte\$ or monocyte\$ or neutrophil or neutrophils or erythrocyte\$ or leukocyte\$).ti,ab,kw.
45. (blood adj1 (test\$ or draw\$)).ti,ab,kw.
46. (neutrophili\$ or monocytosis or basophili\$ or anemi\$ or anaemi\$ or monocytopenia or eosinopenia or basopenia or basocytopenia or thrombocytopeni\$ or leucocytosis or lymphocytosis or eosinophili\$ or leucopenia or leukopenia or neutropenia or lymphopenia or lymphocytopenia or pancytopenia or polycythemia or bicytopenia).ti,ab,kw.
47. or/15-46
48. (abnormalit\$ or diagnos\$ or "pre-diagnos\$" or prediagnos\$ or change\$ or detect\$ or elevat\$ or distribut\$ or deficien\$ or identif\$ or presence or indicati\$ or determin\$ or undiagnosed or definition\$ or altered or alteration\$).ti,ab,kw.
49. 47 and 48
50. (predict\$ or prognos\$ or suspected).ti,ab,kw.
51. (risk adj1 (predict\$ or marker\$ or scor\$)).ti,ab,kw.
52. Predictive Value of Tests/
53. Probability/
54. Prognosis/
55. Risk Factors/
56. Risk Assessment/
57. Incidence/
58. or/50-57
59. 14 and 49 and 58

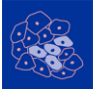

**EMBASE**

Database and platform: Embase 1974 to present. Search date: 3 September 2019.

1. exp Colon Cancer/
2. exp Colon Tumor/
3. exp Rectum Tumor/
4. Colon Polyposis/
5. Hereditary Nonpolyposis Colorectal Cancer/
6. ((colorectal or bowel or colon or colonic or rectal or rectum) adj3 (cancer\$ or carcinoma\$ or adenoma\$ or neoplas\$ or metasta\$ or carcinogen\$ or tumour\$ or tumor\$ or malignan\$ or adenocarcinoma\$)).ti,ab,kw.
7. or/1-6
8. exp Blood Cell Count/
9. Hemoglobin/
10. Hemoglobin Blood Level/
11. Thrombocyte/
12. Neutrophil/
13. Basophil/
14. Eosinophil/
15. Lymphocyte/
16. exp Monocyte/
17. Occult Blood/
18. Thrombocytosis/
19. Leukocytosis/
20. Basophilia/
21. exp Lymphocytosis/
22. Eosinophilia/
23. Monocytosis/
24. Neutrophilia/
25. Anemia/
26. Leukopenia/
27. Monocytopenia/
28. exp Neutropenia/
29. Eosinopenia/
30. Lymphocytopenia/
31. Thrombocytopenia/
32. Polycythemia/
33. Erythrocyte/
34. Leukocyte/
35. Pancytopenia/
36. Mean Corpuscular Volume/
37. ((blood or platelet) adj2 count\$).ti,ab,kw.
38. (CBC or FBC).ti,ab,kw.
39. (blood adj2 exam\$).ti,ab,kw.
40. Hematocrit/
41. (haematolog\$ or hematolog\$ or haemoglobin or hemoglobin or haematocrit or hematocrit).ti,ab,kw.
42. ((red or white) adj1 blood adj1 cell\$).ti,ab,kw.
43. (mean adj1 (platelet or corpuscular) adj1 volume\$).ti,ab,kw.
44. (mean adj1 corpuscular adj1 (haemoglobin or hemoglobin)).ti,ab,kw.

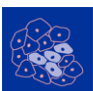

- 45. (platelet\$ or basophil or basophils or eosinophil or eosinophils or lymphocyte\$ or monocyte\$ or neutrophil or neutrophils or erythrocyte\$ or leukocyte\$).ti,ab,kw.
- 46. (blood adj1 (test\$ or draw\$)).ti,ab,kw.
- 47. (neutrophili\$ or monocytosis or basophili\$ or anemi\$ or anaemi\$ or monocytopenia or eosinopenia or basopenia or basocytopenia or thrombocytopeni\$ or leucocytosis or lymphocytosis or eosinophili\$ or leucopenia or leukopenia or neutropenia or lymphopenia or lymphocytopenia or pancytopenia or polycythemia or bicytopenia).ti,ab,kw.
- 48. or/8-47
- 49. (abnormalit\$ or diagnos\$ or "pre-diagnos\$" or prediagnos\$ or change\$ or detect\$ or elevat\$ or distribut\$ or deficien\$ or identif\$ or presence or indicati\$ or determin\$ or undiagnosed or definition\$ or altered or alteration\$).ti,ab,kw.
- 50. 48 and 49
- 51. (predict\$ or prognos\$ or suspected).ti,ab,kw.
- 52. (risk adj1 (predict\$ or marker\$ or scor\$)).ti,ab,kw.
- 53. Predictive Value/
- 54. exp Prediction/
- 55. Probability/
- 56. exp Prognosis/
- 57. "Sensitivity and Specificity"/
- 58. Risk Factor/
- 59. Risk Assessment/
- 60. or/51-59
- 61. 7 and 50 and 60

**CINAHL**

Database and platform: CINAHL (via EBSCOhost). Search date: 3 September 2019.

- 1. (MH "Colonic Neoplasms")
- 2. (MH "Colorectal Neoplasms")
- 3. (MH "Rectal Neoplasms")
- 4. (MH "Adenomatous Polyposis Coli")
- 5. (MH "Sigmoid Neoplasms")
- 6. (MH "Colorectal Neoplasms, Hereditary Nonpolyposis")
- 7. TI ((colorectal or bowel or colon or colonic or rectal or rectum) N3 (cancer\* or carcinoma\* or adenoma\* or neoplas\* or metasta\* or carcinogen\* or tumour\* or tumor\* or malignan\* or adenocarcinoma\*)) OR AB ((colorectal or bowel or colon or colonic or rectal or rectum) N3 (cancer\* or carcinoma\* or adenoma\* or neoplas\* or metasta\* or carcinogen\* or tumour\* or tumor\* or malignan\* or adenocarcinoma\*))
- 8. S1 OR S2 OR S3 OR S4 OR S5 OR S6 OR S7
- 9. (MH "Blood Cells+")
- 10. (MH "Hemoglobins+")
- 11. (MH "Occult Blood")
- 12. (MH "Thrombocytosis")
- 13. (MH "Eosinophilia")
- 14. (MH "Anemia")
- 15. (MH "Leukopenia")
- 16. (MH "Neutropenia")
- 17. (MH "Lymphopenia")
- 18. (MH "Thrombocytopenia")
- 19. (MH "Polycythemia")

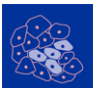

20. (MH "Pancytopenia")
21. TI ((blood or platelet) N2 count\*) OR AB ((blood or platelet) N2 count\*)
22. TI (CBC or FBC) OR AB (CBC or FBC)
23. TI (blood N2 exam\*) OR AB (blood N2 exam\*)
24. TI (haematolog\* or hematolog\* or haemoglobin or hemoglobin or haematocrit or hematocrit) OR AB (haematolog\* or hematolog\* or haemoglobin or hemoglobin or haematocrit or hematocrit)
25. TI ((red or white) N1 blood N1 cell\*) OR AB ((red or white) N1 blood N1 cell\*)
26. TI (mean N1 (platelet or corpuscular) N1 volume\*) OR AB (mean N1 (platelet or corpuscular) N1 volume\*)
27. TI (mean N1 corpuscular N1 (haemoglobin or hemoglobin)) OR AB (mean N1 corpuscular N1 (haemoglobin or hemoglobin))
28. TI (platelet\* or basophil or basophils or eosinophil or eosinophils or lymphocyt\* or monocyt\* or neutrophil or neutrophils or erythrocyt\* or leukocyt\*) OR AB (platelet\* or basophil or basophils or eosinophil or eosinophils or lymphocyt\* or monocyt\* or neutrophil or neutrophils or erythrocyt\* or leukocyt\*)
29. TI (blood N1 (test\* or draw\*)) OR AB (blood N1 (test\* or draw\*))
30. TI (neutrophili\* or monocytosis or basophili\* or anemi\* or anaemi\* or monocytopenia or eosinopenia or basopenia or basocytopenia or thrombocytopeni\* or leucocytosis or lymphocytosis or eosinophili\* or leucopenia or leukopenia or neutropenia or lymphopenia or lymphocytopenia or pancytopenia or polycythemia or bicytopenia) OR AB (neutrophili\* or monocytosis or basophili\* or anemi\* or anaemi\* or monocytopenia or eosinopenia or basopenia or basocytopenia or thrombocytopeni\* or leucocytosis or lymphocytosis or eosinophili\* or leucopenia or leukopenia or neutropenia or lymphopenia or lymphocytopenia or pancytopenia or polycythemia or bicytopenia)
31. S9 OR S10 OR S11 OR S12 OR S13 OR S14 OR S15 OR S16 OR S17 OR S18 OR S19 OR S20 OR S21 OR S22 OR S23 OR S24 OR S25 OR S26 OR S27 OR S28 OR S29 OR S30
32. TI (abnormalit\* or diagnos\* or "pre-diagnos\*" or prediagnos\* or change\* or detect\* or elevat\* or distribut\* or deficien\* or identif\* or presence or indicati\* or determin\* or undiagnosed or definition\* or altered or alteration\*) OR AB (abnormalit\* or diagnos\* or "pre-diagnos\*" or prediagnos\* or change\* or detect\* or elevat\* or distribut\* or deficien\* or identif\* or presence or indicati\* or determin\* or undiagnosed or definition\* or altered or alteration\*)
33. S31 AND S32
34. TI (predict\* or prognos\* or suspected) OR AB (predict\* or prognos\* or suspected)
35. TI (risk N1 (predict\* or marker\* or scor\*)) OR AB (risk N1 (predict\* or marker\* or scor\*))
36. (MH "Predictive Value of Tests")
37. (MH "Probability")
38. (MH "Prognosis")
39. (MH "Risk Factors")
40. (MH "Risk Assessment")
41. (MH "Incidence")
42. S34 OR S35 OR S36 OR S37 OR S38 OR S39 OR S40 OR S41
43. S8 and S33 and S42

### Web of Science

Database and platform: Web of Science (Web of Science Core Collection: Science Citation Index Expanded (SCI-EXPANDED) --1945-present; Social Sciences Citation Index (SSCI) --1956-present; Conference Proceedings Citation Index- Science (CPCI-S) --1990-present) (via Clarivate). Search date: 3 September 2019.



1. TS = ((colorectal or bowel or colon or colonic or rectal or rectum or sigmoid) NEAR/3 (cancer\* or carcinoma\* or adenoma\* or neoplas\* or metasta\* or carcinogen\* or tumour\* or tumor\* or malignan\* or adenocarcinoma\*))
2. SU = Hematology
3. TS = "blood cell count"
4. TS = "occult blood"
5. TS = ((blood or platelet) NEAR/2 count\*)
6. TS = (CBC or FBC)
7. TS = (blood NEAR/2 exam\*)
8. TS = (haematolog\* or hematolog\* or haemoglobin or hemoglobin or haematocrit or hematocrit)
9. TS = ((red or white) NEAR/1 blood NEAR/1 cell\*)
10. TS = (mean NEAR/1 (platelet or corpuscular) NEAR/1 volume\*)
11. TS = (mean NEAR/1 corpuscular NEAR/1 (haemoglobin or hemoglobin))
12. TS = (platelet\* or basophil or basophils or eosinophil or eosinophils or lymphocyte\* or monocyte\* or neutrophil or neutrophils or erythrocyte\* or leukocyte\*)
13. TS = (blood NEAR/1 (test\* or draw\*))
14. TS = (neutrophili\* or monocytosis or basophili\* or anemi\* or anaemi\* or monocytopenia or eosinopenia or eosinophilia or basopenia or basocytopenia or thrombocytopeni\* or thrombocytosis or leucocytosis or lymphocytosis or eosinophili\* or leucopenia or leukopenia or neutropenia or lymphopenia or lymphocytopenia or pancytopenia or polycythemia or bicytopenia)
15. #2 or #3 or #4 or #5 or #6 or #7 or #8 or #9 or #10 or #11 or #12 or #13 or #14
16. TS = (abnormalit\* or diagnos\* or "pre-diagnos\*" or prediagnos\* or change\* or detect\* or elevat\* or distribut\* or deficien\* or identif\* or presence or indicati\* or determin\* or undiagnosed or definition\* or altered or alteration\*)
17. #15 and #16
18. TS = (predict\* or prognos\* or probabilit\* or suspected)
19. TS = (risk NEAR/1 (predict\* or marker\* or scor\*))
20. #18 or #19
21. #1 and #17 and #20

### 3. Association between full blood count and colorectal cancer

**Table S2.** Full blood count components analysed per study.

| Article               | RB<br>C                                                                                                               | WB<br>C | Hb | H<br>c | MC<br>V | MC<br>H | MCH<br>C | RD<br>W | Pla<br>t | MP<br>V | Bas<br>C | Bas<br>P | Eos<br>C | Eos<br>P | Lym<br>C | Lym<br>P | Mon<br>C | Mon<br>P | Neu<br>C | Neu<br>P | Tot<br>al |    |
|-----------------------|-----------------------------------------------------------------------------------------------------------------------|---------|----|--------|---------|---------|----------|---------|----------|---------|----------|----------|----------|----------|----------|----------|----------|----------|----------|----------|-----------|----|
| Acher 2003<br>[1]     |                                                                                                                       |         | X  |        | X       |         | X        |         |          |         |          |          |          |          |          |          |          |          |          |          |           | 3  |
| Ankus 2018<br>[2]     |                                                                                                                       |         |    |        |         |         |          |         |          | X       |          |          |          |          |          |          |          |          |          |          |           | 1  |
| Ay 2015 [3]           |                                                                                                                       |         | X  |        | X       |         |          | X       | X        |         |          |          |          |          |          |          |          |          |          |          |           | 4  |
| Ayling 2019<br>[4]    | External validation study – does not analyse full blood count, but instead performance of existing prediction models. |         |    |        |         |         |          |         |          |         |          |          |          |          |          |          |          |          |          |          |           |    |
| Bafandeh<br>2008 [5]  |                                                                                                                       |         | X  |        |         |         |          |         |          |         |          |          |          |          |          |          |          |          |          |          |           | 1  |
| Bailey 2017<br>[6]    |                                                                                                                       |         |    |        |         |         |          |         |          | X       |          |          |          |          |          |          |          |          |          |          |           | 1  |
| Birks 2017 [7]        | External validation study – does not analyse full blood count, but instead performance of existing prediction models. |         |    |        |         |         |          |         |          |         |          |          |          |          |          |          |          |          |          |          |           |    |
| Boursi 2016<br>[8]    | X                                                                                                                     | X       | X  | X      | X       | X       |          |         |          | X       |          | X        |          | X        |          |          | X        |          |          | X        |           | 12 |
| Cakmak 2017<br>[9]    |                                                                                                                       |         | X  |        |         |         |          | X       | X        |         |          |          |          |          |          |          |          |          |          |          |           | 3  |
| Collins 2012<br>[10]  | External validation study – does not analyse full blood count, but instead performance of existing prediction models. |         |    |        |         |         |          |         |          |         |          |          |          |          |          |          |          |          |          |          |           |    |
| Cross 2019<br>[11]    |                                                                                                                       |         | X  |        |         |         |          |         |          |         |          |          |          |          |          |          |          |          |          |          |           | 1  |
| Cubiella 2016<br>[12] |                                                                                                                       |         | X  |        | X       |         |          |         |          |         |          |          |          |          |          |          |          |          |          |          |           | 2  |
| Fijten 1995<br>[13]   |                                                                                                                       | X       | X  |        |         |         |          |         |          |         |          |          |          |          |          |          |          |          |          |          |           | 2  |
| Firat 2016<br>[14]    |                                                                                                                       | X       | X  |        |         |         |          |         |          | X       |          |          |          |          |          |          |          |          |          |          |           | 3  |



|                         |                                                                                                                       |   |   |   |   |   |   |   |   |   |   |   |   |   |   |   |   |   |   |   |   |    |
|-------------------------|-----------------------------------------------------------------------------------------------------------------------|---|---|---|---|---|---|---|---|---|---|---|---|---|---|---|---|---|---|---|---|----|
| Goldshtein 2010 [15]    |                                                                                                                       |   |   | X |   |   |   |   |   |   |   |   |   |   |   |   |   |   |   |   |   | 1  |
| Goshen 2017 [16]        | X                                                                                                                     | X | X | X |   |   | X | X | X | X |   | X |   | X |   | X |   | X |   |   |   | 12 |
| Hamilton 2005 [17]      |                                                                                                                       |   |   | X |   |   |   |   |   |   |   |   |   |   |   |   |   |   |   |   |   | 1  |
| Hamilton 2008 [18]      |                                                                                                                       |   |   | X | X |   |   |   |   |   |   |   |   |   |   |   |   |   |   |   |   | 2  |
| Hamilton 2009 [19]      |                                                                                                                       |   |   | X | X |   |   |   |   |   |   |   |   |   |   |   |   |   |   |   |   | 2  |
| Hilsden 2018 [20]       | External validation study – does not analyse full blood count, but instead performance of existing prediction models. |   |   |   |   |   |   |   |   |   |   |   |   |   |   |   |   |   |   |   |   |    |
| Hippisley-Cox 2012 [21] |                                                                                                                       |   |   | X |   |   |   |   |   |   |   |   |   |   |   |   |   |   |   |   |   | 1  |
| Hippisley-Cox 2013 [22] |                                                                                                                       |   |   | X |   |   |   |   |   |   |   |   |   |   |   |   |   |   |   |   |   | 1  |
| Hippisley-Cox 2013 [23] |                                                                                                                       |   |   | X |   |   |   |   |   |   |   |   |   |   |   |   |   |   |   |   |   | 1  |
| Hornbrook 2017 [24]     | External validation study – does not analyse full blood count, but instead performance of existing prediction models. |   |   |   |   |   |   |   |   |   |   |   |   |   |   |   |   |   |   |   |   |    |
| Huang 2019 [25]         |                                                                                                                       | X | X |   |   |   |   |   |   |   |   |   |   |   | X |   |   |   |   |   |   | 3  |
| Hung 2015 [26]          |                                                                                                                       |   |   | X |   |   |   |   |   |   |   |   |   |   |   |   |   |   |   |   |   | 1  |
| Joosten 2008 [27]       |                                                                                                                       |   |   | X |   |   |   |   |   |   |   |   |   |   |   |   |   |   |   |   |   | 1  |
| Kilincalp 2015 [28]     |                                                                                                                       |   |   | X |   |   |   |   | X | X |   |   |   |   |   |   |   |   |   |   |   | 3  |
| Kinar 2016 [29]         | X                                                                                                                     | X | X | X | X | X | X | X | X | X | X | X | X | X | X | X | X | X | X | X | X | 20 |
| Kinar 2017 [30]         | External validation study – does not analyse full blood count, but instead performance of existing prediction models. |   |   |   |   |   |   |   |   |   |   |   |   |   |   |   |   |   |   |   |   |    |

|                              |   |   |   |   |  |   |
|------------------------------|---|---|---|---|--|---|
| Lawrenson<br>2006 [31]       |   | X |   |   |  | 1 |
| Lee 2006 [32]                | X |   |   |   |  | 1 |
| Margolis<br>2007 [33]        | X |   |   |   |  | 1 |
| Marshall<br>2011 [34]        |   | X | X |   |  | 2 |
| Mashlab<br>2018 [35]         |   | X | X |   |  | 2 |
| Naef 1999<br>[36]            |   | X |   |   |  | 1 |
| Nakama 2000<br>[37]          |   | X |   |   |  | 1 |
| Panagiotopoulou 2014<br>[38] |   | X | X |   |  | 2 |
| Panzuto 2003<br>[39]         |   | X | X |   |  | 2 |
| Pilling 2018<br>[40]         |   | X | X | X |  | 3 |
| Prizment<br>2011 [41]        | X |   |   |   |  | 1 |
| Raje 2007<br>[42]            |   | X | X |   |  | 2 |
| Schneider<br>2018 [43]       | X | X | X |   |  | 3 |
| Shi 2019 [44]                |   |   |   | X |  | 1 |
| Song 2018<br>[45]            |   |   |   | X |  | 1 |
| Spell 2004<br>[46]           |   | X | X | X |  | 3 |

|                                               |     |     |     |    |     |    |    |     |     |     |    |    |    |    |     |    |    |    |     |    |  |   |   |   |
|-----------------------------------------------|-----|-----|-----|----|-----|----|----|-----|-----|-----|----|----|----|----|-----|----|----|----|-----|----|--|---|---|---|
| Stapley 2006 [47]                             |     |     |     |    |     |    |    |     |     |     |    |    |    |    |     |    |    |    |     |    |  | X | 1 |   |
| Thompson 2017 [48]                            |     |     |     |    |     |    |    |     |     |     |    |    |    |    |     |    |    |    |     |    |  |   | X | 1 |
| van Boxtel-Wilms 2016 [49]                    |     |     |     |    |     |    |    |     |     |     |    |    |    |    |     |    |    |    |     |    |  |   | X | 1 |
| Wu 2019 [50]                                  | X   | X   | X   |    |     |    |    |     | X   | X   |    |    |    |    | X   |    | X  |    | X   |    |  |   |   | 8 |
| Yang 2018 [51]                                |     |     |     |    |     |    |    |     | X   | X   |    |    |    |    | X   |    |    |    |     |    |  | X |   | 5 |
| Zhou 2017 [52]                                |     |     |     |    |     |    |    |     |     |     |    |    |    |    |     | X  |    |    |     |    |  |   | X | 3 |
| Zhu 2018 [53]                                 |     |     |     |    |     |    |    |     | X   | X   |    |    |    |    |     |    |    |    |     |    |  |   |   | 2 |
| Total                                         | 5   | 11  | 38  | 2  | 16  | 2  | 2  | 9   | 12  | 5   | 3  | 1  | 3  | 1  | 6   | 2  | 4  | 1  | 5   | 2  |  |   |   |   |
| Proportion of non-validation studies (n = 47) | 11% | 23% | 81% | 4% | 34% | 4% | 4% | 19% | 26% | 11% | 6% | 2% | 6% | 2% | 13% | 4% | 9% | 2% | 11% | 4% |  |   |   |   |

Abbreviations: RBC = red blood cells, WBC = white blood cells, Hb = haemoglobin, Hc = haematocrit, MCV = mean corpuscular volume, MCH = mean corpuscular haemoglobin, MCHC = mean corpuscular haemoglobin concentration, RDW = red blood cell distribution width, Plat = platelet count, MPV = mean platelet volume, BasC = basophil count, BasP = basophil %, EosC = eosinophil count, EosP = eosinophil %, LymC = lymphocyte count, LymP = lymphocyte %, MonC = monocyte count, MonP = monocyte %, NeuC = neutrophil count, NeuP = neutrophil %

**Table S3:** Red blood cell count for colorectal cancer, with analyses sorted by outcome time window, country, and strata

| Country                                       | Strata                           | Article<br>(Study outcome window)                  | Analysis type | CRC outcome groups and no. per group                                                                  | Blood level categories and no. per group              | Analysis estimates                             | <i>p</i> -value |
|-----------------------------------------------|----------------------------------|----------------------------------------------------|---------------|-------------------------------------------------------------------------------------------------------|-------------------------------------------------------|------------------------------------------------|-----------------|
| <b>0 &lt; outcome time window ≤ 6 months:</b> |                                  |                                                    |               |                                                                                                       |                                                       |                                                |                 |
| China                                         | Everyone                         | Wu 2019 [50]<br>(At diagnosis)                     | T-test        | Yes, n = 186                                                                                          |                                                       | Mean = 4.42 10 <sup>12</sup> /L<br>(SD = 0.63) | <0.05           |
|                                               |                                  |                                                    |               | No, n = 108                                                                                           |                                                       | Mean = 4.73 10 <sup>12</sup> /L<br>(SD = 0.42) |                 |
|                                               |                                  | Wu 2019 [50]<br>(At diagnosis)                     | T-test        | Yes, n = 186                                                                                          |                                                       | Mean = 4.42 10 <sup>12</sup> /L<br>(SD = 0.63) | <0.05           |
|                                               |                                  |                                                    |               | Polyp, n = 132                                                                                        |                                                       | Mean = 4.78 10 <sup>12</sup> /L<br>(SD = 0.72) |                 |
| Wu 2019 [50]<br>(At diagnosis)                | ANOVA                            | Yes, n = 186<br>Polyp, n = 132<br>Healthy, n = 108 |               | Mean = 4.42 10 <sup>12</sup> /L<br>Mean = 4.78 10 <sup>12</sup> /L<br>Mean = 4.73 10 <sup>12</sup> /L | <0.001                                                |                                                |                 |
| Israel                                        | Males                            | Goshen 2017 [16]<br>(1–6 months)                   | T-test        | Yes, n = 936                                                                                          |                                                       | Mean = 4.76 10 <sup>12</sup> /L                | <0.0001         |
|                                               |                                  |                                                    |               | No, n = 28491                                                                                         |                                                       | Mean = 4.87 10 <sup>12</sup> /L                |                 |
|                                               | Goshen 2017 [16]<br>(1–6 months) | Risk ratio                                         | Yes           |                                                                                                       | Highest-risk quintile                                 | RR = 1.75 (95% CI = 1.45, 2.24)                |                 |
|                                               |                                  |                                                    | No            |                                                                                                       | Lowest-risk quintile                                  |                                                | Reference       |
| Females                                       | Goshen 2017 [16]<br>(1–6 months) | T-test                                             | Yes, n = 819  |                                                                                                       | Mean = 4.48 10 <sup>12</sup> /L                       | <0.0001                                        |                 |
|                                               |                                  |                                                    | No, n = 26239 |                                                                                                       | Mean = 4.39 10 <sup>12</sup> /L                       |                                                |                 |
| Goshen 2017 [16]<br>(1–6 months)              | Risk ratio                       | Yes                                                |               | Highest-risk quintile                                                                                 | RR = 1.97 (95% CI = 1.51, 2.61)                       |                                                |                 |
|                                               |                                  | No                                                 |               | Lowest-risk quintile                                                                                  |                                                       | Reference                                      |                 |
| UK                                            | Males                            | Schneider 2018 [43]<br>(6 months)                  | Odds ratio    | Yes, n = 2266                                                                                         | <3.5 10 <sup>12</sup> /L, n = 191, events = 162       | OR = 2.86 (95% CI = 1.90, 4.31)                |                 |
|                                               |                                  |                                                    |               | No, n = 1006                                                                                          | 3.5–4.2 10 <sup>12</sup> /L, n = 951, events = 721    | OR = 1.61 (95% CI = 1.34, 1.93)                |                 |
|                                               |                                  |                                                    |               |                                                                                                       | 4.3–4.9 10 <sup>12</sup> /L, n = 1608, events = 1,603 | Reference                                      |                 |

|                                                |                                  |                 |               |                                                       |                                 |                                        |
|------------------------------------------------|----------------------------------|-----------------|---------------|-------------------------------------------------------|---------------------------------|----------------------------------------|
|                                                |                                  |                 |               | 5–5.8 10 <sup>12</sup> /L, n = 516, events = 314      | OR = 0.80 (95% CI = 0.65, 0.98) |                                        |
|                                                |                                  |                 |               | ≥5.9 10 <sup>12</sup> /L, n = 6, events = 6           | X                               |                                        |
|                                                | Schneider 2018 [43] <sub>1</sub> | Odds ratio      | Yes, n = 2266 | <3.5 10 <sup>12</sup> /L, n = 191, events = 162       | OR = 3.72 (95% CI = 2.36, 5.88) |                                        |
|                                                | (6 months)                       |                 | No, n = 1006  | 3.5–4.2 10 <sup>12</sup> /L, n = 951, events = 721    | OR = 1.93 (95% CI = 1.57, 2.37) |                                        |
|                                                |                                  |                 |               | 4.3–4.9 10 <sup>12</sup> /L, n = 1608, events = 1,603 | Reference                       |                                        |
|                                                |                                  |                 |               | 5–5.8 10 <sup>12</sup> /L, n = 516, events = 314      | OR = 0.83 (95% CI = 0.66, 1.04) |                                        |
|                                                |                                  |                 |               | ≥5.9 10 <sup>12</sup> /L, n = 6, events = 6           | X                               |                                        |
| Females                                        | Schneider 2018 [43] <sub>1</sub> | Odds ratio      | Yes, n = 2038 | <3.5 10 <sup>12</sup> /L, n = 352, events = 331       | OR = 4.10 (95% CI = 2.72, 6.17) |                                        |
|                                                | (6 months)                       |                 | No, n = 857   | 3.5–4.2 10 <sup>12</sup> /L, n = 1302, events = 960   | OR = 1.81 (95% CI = 1.53, 2.15) |                                        |
|                                                |                                  |                 |               | 4.3–4.9 10 <sup>12</sup> /L, n = 1119, events = 680   | Reference                       |                                        |
|                                                |                                  |                 |               | 5–5.8 10 <sup>12</sup> /L, n = 122, events = 67       | OR = 0.79 (95% CI = 0.21, 1.15) |                                        |
|                                                |                                  |                 |               | ≥5.9 10 <sup>12</sup> /L, n = 6, events = 6           | X                               |                                        |
|                                                | Schneider 2018 [43] <sub>1</sub> | Odds ratio      | Yes, n = 2038 | <3.5 10 <sup>12</sup> /L, n = 352, events = 331       | OR = 5.68 (95% CI = 3.55, 9.09) |                                        |
|                                                | (6 months)                       |                 | No, n = 857   | 3.5–4.2 10 <sup>12</sup> /L, n = 1302, events = 960   | OR = 1.94 (95% CI = 1.60, 2.36) |                                        |
|                                                |                                  |                 |               | 4.3–4.9 10 <sup>12</sup> /L, n = 1119, events = 680   | Reference                       |                                        |
|                                                |                                  |                 |               | 5–5.8 10 <sup>12</sup> /L, n = 122, events = 67       | OR = 0.75 (95% CI = 0.49, 1.14) |                                        |
|                                                |                                  |                 |               | ≥5.9 10 <sup>12</sup> /L, n = 6, events = 6           | X                               |                                        |
| <b>6 &lt; outcome time window ≤ 12 months:</b> |                                  |                 |               |                                                       |                                 |                                        |
| UK                                             | Everyone                         | Boursi 2016 [8] | Odds ratio    | Yes, n = 4929                                         | <i>Modelled as continuous</i>   | OR = 0.62 (95% CI = 0.57, 0.67) <0.001 |

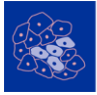

---

Abbreviations: CRC = colorectal cancer, OR = odds ratio, RR = risk ratio. <sup>1</sup>Multivariable effect estimate, adjusted for: BMI, smoking status, history of hypertension, diabetes, aspirin or NSAIDS use, vitamin K antagonists, platelet inhibitors

**Table S4:** White blood cell count for colorectal cancer, with analyses sorted by outcome time window, country, and strata

| Country                                       | Strata         | Article                                   | Analysis type | CRC outcome groups and no. per group                                                                     | Blood level categories and no. per group | Analysis estimates                                                                                 | <i>p</i> -value |
|-----------------------------------------------|----------------|-------------------------------------------|---------------|----------------------------------------------------------------------------------------------------------|------------------------------------------|----------------------------------------------------------------------------------------------------|-----------------|
| <b>0 &lt; outcome time window ≤ 6 months:</b> |                |                                           |               |                                                                                                          |                                          |                                                                                                    |                 |
| China                                         | Everyone       | Huang 2019 [25]<br>(At admission)         | T-test        | Yes, n = 162                                                                                             |                                          | Mean = 6.76 10 <sup>9</sup> /L<br>(SD = 1.68)                                                      | ≥0.05           |
|                                               |                |                                           |               | No, n = 78                                                                                               |                                          | Mean = 6.42 10 <sup>9</sup> /L<br>(SD = 1.60)                                                      |                 |
|                                               |                | Huang 2019 [25]<br>(At admission)         | T-test        | Yes, n = 162                                                                                             |                                          | Mean = 6.76 10 <sup>9</sup> /L<br>(SD = 1.68)                                                      | <0.05           |
|                                               |                |                                           |               | Polyp, n = 92                                                                                            |                                          | Mean = 6.25 10 <sup>9</sup> /L<br>(SD = 1.5)                                                       |                 |
|                                               |                | Wu 2019 [50]<br>(At diagnosis)            | T-test        | Yes, n = 186                                                                                             |                                          | Mean = 6.77 10 <sup>9</sup> /L<br>(SD = 1.64)                                                      | <0.05           |
|                                               |                |                                           |               | No, n = 108                                                                                              |                                          | Mean = 6.23 10 <sup>9</sup> /L<br>(SD = 1.02)                                                      |                 |
|                                               |                | Wu 2019 [50]<br>(At diagnosis)            | T-test        | Yes, n = 186                                                                                             |                                          | Mean = 6.77 10 <sup>9</sup> /L<br>(SD = 1.64)                                                      | <0.05           |
|                                               |                |                                           |               | Polyp, n = 132                                                                                           |                                          | Mean = 6.32 10 <sup>9</sup> /L<br>(SD = 1.61)                                                      |                 |
|                                               |                | Wu 2019 [50]<br>(At diagnosis)            | ANOVA         | Yes = 186<br>Polyp = 132<br>Healthy = 108                                                                |                                          | Mean = 6.77 10 <sup>9</sup> /L<br>Mean = 6.32 10 <sup>9</sup> /L<br>Mean = 6.23 10 <sup>9</sup> /L | 0.003           |
| Zhou 2017 [52]<br>(At diagnosis)              | Mann-Whitney U | Yes, n = 242<br>No, n = 248               |               | Median = 6.62 10 <sup>9</sup> /L<br>Median = 6.15 10 <sup>9</sup> /L                                     | <0.001                                   |                                                                                                    |                 |
| Zhou 2017 [52]<br>(At diagnosis)              | Mann-Whitney U | Yes, n = 242<br>Polyp, n = 248            |               | Median = 6.62 10 <sup>9</sup> /L<br>Median = 6.22 10 <sup>9</sup> /L                                     | <0.001                                   |                                                                                                    |                 |
| Zhou 2017 [52]<br>(At diagnosis)              | Kruskal-Wallis | Yes = 242<br>Polyp = 248<br>Healthy = 262 |               | Median = 6.62 10 <sup>9</sup> /L<br>Median = 6.22 10 <sup>9</sup> /L<br>Median = 6.15 10 <sup>9</sup> /L | <0.001                                   |                                                                                                    |                 |
| Israel                                        | Males          | Goshen 2017 [16]                          | T-test        | Yes, n = 936                                                                                             |                                          | Mean = 7.79 10 <sup>9</sup> /L                                                                     | <0.0001         |

|                                                |          |                                       |              |                                 |                                                                                                                                                          |                                                                                                                   |         |
|------------------------------------------------|----------|---------------------------------------|--------------|---------------------------------|----------------------------------------------------------------------------------------------------------------------------------------------------------|-------------------------------------------------------------------------------------------------------------------|---------|
|                                                |          | (1–6 months)                          |              | No, n = 28491                   |                                                                                                                                                          | Mean = 7.20 10 <sup>9</sup> /L                                                                                    |         |
|                                                |          | Goshen 2017 [16]                      | Risk ratio   | Yes                             | Highest-risk quintile                                                                                                                                    | RR = 2.31 (95% CI = 1.87, 3.05)                                                                                   |         |
|                                                |          | (1–6 months)                          |              | No                              | Lowest-risk quintile                                                                                                                                     | Reference                                                                                                         |         |
| Females                                        |          | Goshen 2017 [16]                      | T-test       | Yes, n = 819                    |                                                                                                                                                          | Mean = 7.46 10 <sup>9</sup> /L                                                                                    | <0.0001 |
|                                                |          | (1–6 months)                          |              | No, n = 26239                   |                                                                                                                                                          | Mean = 6.65 10 <sup>9</sup> /L                                                                                    |         |
|                                                |          | Goshen 2017 [16]                      | Risk ratio   | Yes                             | Highest-risk quintile                                                                                                                                    | RR = 2.17 (95% CI = 1.66, 3.02)                                                                                   |         |
|                                                |          | (1–6 months)                          |              | No                              | Lowest-risk quintile                                                                                                                                     | Reference                                                                                                         |         |
| Turkey                                         | Everyone | Firat 2016 [14] (At diagnosis)        | Chi-squared  | Yes<br>No                       |                                                                                                                                                          |                                                                                                                   | 0.463   |
| <b>6 &lt; outcome time window ≤ 12 months:</b> |          |                                       |              |                                 |                                                                                                                                                          |                                                                                                                   |         |
| UK                                             | Everyone | Boursi 2016 [8] (1 year)              | Odds ratio   | Yes, n = 4929<br>No, n = 11311  | <i>Modelled as continuous</i>                                                                                                                            | OR = 1.11 (95% CI = 1.09, 1.13)                                                                                   | <0.001  |
|                                                |          | Boursi 2016 [8] <sup>1</sup> (1 year) | Odds ratio   | Yes, n = 3375<br>No, n = 8560   | <i>Modelled as fractional polynomials (powers: 1, 1)</i>                                                                                                 | OR = 5.25*WBC <sup>1</sup><br>OR = 0.30*WBC <sup>1</sup> × ln(WBC)                                                |         |
| <b>Outcome time window ≥ 36 months:</b>        |          |                                       |              |                                 |                                                                                                                                                          |                                                                                                                   |         |
| Korea                                          | Males    | Lee 2006 [32] (10 years)              | Odds ratio   | Yes, n = 1122<br>No, n = 107785 | ≤5000 μL, n = 18611, events = 183<br>5501–6500 μL, n = 24567, events = 228<br>6501–7600 μL, n = 28018, events = 276<br>>7600 μL, n = 37711, events = 435 | Reference<br>OR = 0.94 (95% CI = 0.78, 1.15)<br>OR = 1.00 (95% CI = 0.83, 1.21)<br>OR = 1.18 (95% CI = 0.99, 1.4) |         |
|                                                | Males    | Lee 2006 [32] <sup>2</sup> (10 years) | Hazard ratio | Yes, n = 1122<br>No, n = 107785 | ≤5000 μL, n = 18611, events = 183<br>5501–6500 μL, n = 24567, events = 228                                                                               | Reference<br>HR = 0.95 (95% CI = 0.78, 1.15)                                                                      |         |



|         |                                          |                                                  |                                 |                                                                                                                                                                                                           |                                                                                                                             |
|---------|------------------------------------------|--------------------------------------------------|---------------------------------|-----------------------------------------------------------------------------------------------------------------------------------------------------------------------------------------------------------|-----------------------------------------------------------------------------------------------------------------------------|
|         |                                          |                                                  |                                 | 6501–7600 $\mu\text{L}$ , n = 28018,<br>events = 276                                                                                                                                                      | HR = 1.02 (95% CI =<br>0.84, 1.23)                                                                                          |
|         |                                          |                                                  |                                 | >7600 $\mu\text{L}$ , n = 37711, events =<br>435                                                                                                                                                          | HR = 1.23 (95% CI =<br>1.03, 1.47)                                                                                          |
| Females | Lee 2006 [32]<br>(10 years)              | Odds ratio                                       | Yes, n = 1529<br>No, n = 313983 | $\leq 5000$ , n = 90790, events = 405<br>5501–6500 $\mu\text{L}$ , n = 84260,<br>events = 400<br>6501–7600 $\mu\text{L}$ , n = 73364,<br>events = 353<br>>7600 $\mu\text{L}$ , n = 67098, events =<br>371 | Reference<br>OR = 1.06 (95% CI =<br>0.93, 1.22)<br>OR = 1.08 (95% CI =<br>0.94, 1.24)<br>OR = 1.24 (95% CI =<br>1.08, 1.43) |
| Females | Lee 2006 [32] <sup>2</sup><br>(10 years) | Hazard ratio                                     | Yes, n = 1529<br>No, n = 313983 | $\leq 5000$ , n = 90790, events = 405<br>5501–6500 $\mu\text{L}$ , n = 84260,<br>events = 400<br>6501–7600 $\mu\text{L}$ , n = 73364,<br>events = 353<br>>7600 $\mu\text{L}$ , n = 67098, events =<br>371 | Reference<br>HR = 1.03 (95% CI =<br>0.90, 1.19)<br>HR = 1.03 (95% CI =<br>0.89, 1.19)<br>HR = 1.15 (95% CI =<br>0.99, 1.33) |
| UK      | Everyone                                 | Margolis 2007<br>[33] <sup>3</sup><br>(11 years) | Hazard ratio                    | Yes, n = 1341<br>No, n = 142407                                                                                                                                                                           | <i>Modelled as continuous</i><br>HR = 1.08 (95% CI =<br>1.04, 1.12)                                                         |
| USA     | Everyone                                 | Prizment 2011<br>[41]<br>(19 years)              | Odds ratio                      | Yes, n = 308<br>No, n = 13106                                                                                                                                                                             | Reference<br>OR = 0.80 (95% CI =<br>0.58, 1.12)<br>OR = 1.18 (95% CI =<br>0.86, 1.60)<br>OR = 1.01 (95% CI =<br>0.73, 1.38) |
|         |                                          | Prizment 2011<br>[41] <sup>4</sup><br>(19 years) | Hazard ratio                    | Yes, n = 308<br>No, n = 13106                                                                                                                                                                             | Reference<br>HR = 0.86 (95% CI =<br>0.61, 1.21)                                                                             |

5.9–7.0 10<sup>9</sup>/L, n = 3155, events = 86      HR = 1.26 (95% CI = 0.91, 1.74)  
 ≥7.1 10<sup>9</sup>/L, n = 3292, events = 78      HR = 1.13 (95% CI = 0.79, 1.60)

**OUTCOME WINDOW NOT CATEGORISABLE: > 12-month risk of CRC diagnosis:**

|             |          |                  |             |             |                          |                                 |       |
|-------------|----------|------------------|-------------|-------------|--------------------------|---------------------------------|-------|
| Netherlands | Everyone | Fijten 1995 [13] | Chi-squared | Yes, n = 4  | Low, n = 194, events = 1 |                                 | <0.01 |
|             |          | (>12 months)     |             | No, n = 215 | High, n = 25, events = 3 |                                 |       |
|             |          | Fijten 1995 [13] | Odds ratio  | Yes, n = 4  | Low, n = 194, events = 1 | Reference                       |       |
|             |          | (>12 months)     |             | No, n = 215 | High, n = 25, events = 3 | OR = 26.3 (95% CI = 2.6, 264.0) |       |

Abbreviations: CRC = colorectal cancer, OR = odds ratio, RR = risk ratio, HR = hazard ratio, WBC = white blood cell count. <sup>1</sup>Multivariable effect estimate, adjusted for: haemoglobin, mean corpuscular volume, neutrophil-lymphocyte ratio, platelet count, sex, previous metformin prescriptions, previous prescriptions for oral hypoglycemic drugs other than metformin. <sup>2</sup>Multivariable effect estimate, adjusted for: age, BMI, total cholesterol, smoking status, regular exercise, alcohol consumption per day, frequency of meat intake per week, hypertension, diabetes. <sup>3</sup>Multivariable effect estimate, adjusted for: age, ethnicity, smoking, alcohol use, physical activity, aspirin/nonsteroidal anti-inflammatory drug use, hormone therapy use, BMI, history of diabetes, family history of colorectal cancer. <sup>4</sup>Multivariable effect estimate, adjusted for: age, race, center, education, BMI, aspirin use, smoking status, pack-years of smoking, gender-HRT, diabetes.

**Table S5:** Haemoglobin levels for colorectal cancer, with analyses sorted by outcome time window, country, and strata

| Country                                       | Strata   | Article           | Analysis type  | CRC outcome groups and no. per group | Blood level categories and no. per group         | Analysis estimates             | <i>p</i> -value                |       |
|-----------------------------------------------|----------|-------------------|----------------|--------------------------------------|--------------------------------------------------|--------------------------------|--------------------------------|-------|
| <b>0 &lt; outcome time window ≤ 6 months:</b> |          |                   |                |                                      |                                                  |                                |                                |       |
| China                                         | Everyone | Huang 2019 [25]   | T-test         | Yes, n = 162                         |                                                  | Mean = 119.62 g/dL (SD = 23.8) | <0.05                          |       |
|                                               |          | (At admission)    |                | No, n = 78                           |                                                  | Mean = 146.25 g/dL (SD = 15.1) |                                |       |
|                                               |          | Huang 2019 [25]   | T-test         | Yes, n = 162                         |                                                  | Mean = 119.62 g/dL (SD = 23.8) | <0.05                          |       |
|                                               |          | (At admission)    |                | Polyp, n = 92                        |                                                  | Mean = 134.1 g/dL (SD = 16.1)  |                                |       |
|                                               |          |                   | Wu 2019 [50]   | T-test                               | Yes, n = 186                                     |                                | Mean = 121.27 g/L (SD = 23.07) | <0.05 |
|                                               |          |                   | (At diagnosis) |                                      | No, n = 108                                      |                                | Mean = 142.47 g/L (SD = 11.80) |       |
|                                               |          |                   | Wu 2019 [50]   | T-test                               | Yes, n = 186                                     |                                | Mean = 121.27 g/L (SD = 23.07) | <0.05 |
| (At diagnosis)                                |          |                   | Polyp, n = 132 |                                      | Mean = 132.12 g/L (SD = 20.03)                   |                                |                                |       |
|                                               |          | Wu 2019 [50]      | ANOVA          | Yes = 186                            |                                                  | Mean = 121.27 g/L              | <0.001                         |       |
|                                               |          | (At diagnosis)    |                | Polyp = 132                          |                                                  | Mean = 132.12 g/L              |                                |       |
|                                               |          | Wu 2019 [50]      |                | Healthy = 108                        |                                                  | Mean = 142.47 g/L              |                                |       |
|                                               |          | Yang 2018 [51]    | Mann-Whitney U | Yes, n = 85                          |                                                  | Median = 122 g/L               | 0.004                          |       |
|                                               |          | (At admission)    |                | Polyp, n = 54                        |                                                  | Median = 131.5 g/L             |                                |       |
| Belgium                                       | Everyone | Joosten 2008 [27] | Chi-squared    | Yes, n = 55                          | Men<13 g/dL, Women<12 g/dL, n = 251, events = 42 |                                | 0.26                           |       |

|                               |                               |                                |               |                       |                                                                |                                 |                                 |            |
|-------------------------------|-------------------------------|--------------------------------|---------------|-----------------------|----------------------------------------------------------------|---------------------------------|---------------------------------|------------|
|                               |                               | (8 weeks)                      |               | No, n = 304           | Men $\geq$ 13 g/dL, Women $\geq$ 12 g/dL, n = 108, events = 13 |                                 |                                 |            |
|                               |                               | Joosten 2008 [27]              | T-test        | Yes, n = 55           |                                                                | Mean = 10.2 g/dL (SD = 2.9)     | 0.14                            |            |
|                               |                               | (8 weeks)                      |               | No, n = 304           |                                                                | Mean = 10.8 g/dL (SD = 2.7)     |                                 |            |
|                               |                               | Joosten 2008 [27]              | Odds ratio    | Yes, n = 55           | Men $<$ 13 g/dL, Women $<$ 12 g/dL, n = 251, events = 42       | OR = 1.47 (95% CI = 0.75, 2.86) |                                 |            |
|                               |                               | (8 weeks)                      |               | No, n = 304           | Men $\geq$ 13 g/dL, Women $\geq$ 12 g/dL, n = 108, events = 13 | Reference                       |                                 |            |
|                               |                               | Joosten 2008 [27] <sup>1</sup> | Odds ratio    | Yes, n = 55           |                                                                |                                 | $\geq$ 0.05                     |            |
|                               |                               | (8 weeks)                      |               | No, n = 304           |                                                                |                                 |                                 |            |
| Israel                        | Males                         | Goshen 2017 [16]               | T-test        | Yes, n = 936          |                                                                | Mean = 13.30 g/dL               | $<$ 0.0001                      |            |
|                               |                               | (1–6 months)                   |               | No, n = 28491         |                                                                | Mean = 14.43 g/dL               |                                 |            |
|                               |                               | Goshen 2017 [16]               | Risk ratio    | Yes                   |                                                                | Highest-risk quintile           | RR = 3.06 (95% CI = 2.76, 3.52) |            |
|                               | (1–6 months)                  |                                | No            |                       | Lowest-risk quintile                                           | Reference                       |                                 |            |
|                               | Goshen 2017 [16] <sup>2</sup> | Risk ratio                     | Yes, n = 936  |                       | Highest-risk quintile                                          | RR = 3.83 (95% CI = 3.38, 4.46) |                                 |            |
|                               | (1–6 months)                  |                                | No, n = 28491 |                       | Lowest-risk quintile                                           | Reference                       |                                 |            |
|                               | Females                       | Goshen 2017 [16]               | T-test        | Yes, n = 819          |                                                                |                                 | Mean = 11.80 g/dL               | $<$ 0.0001 |
|                               |                               | (1–6 months)                   |               | No, n = 26239         |                                                                |                                 | Mean = 13.02 g/dL               |            |
|                               |                               | Goshen 2017 [16]               | Risk ratio    | Yes                   |                                                                | Highest-risk quintile           | RR = 5.69 (95% CI = 4.31, 7.97) |            |
| (1–6 months)                  |                               |                                | No            |                       | Lowest-risk quintile                                           | Reference                       |                                 |            |
| Goshen 2017 [16] <sup>3</sup> | Risk ratio                    | Yes, n = 819                   |               | Highest-risk quintile | RR = 5.69 (95% CI = 4.31, 7.97)                                |                                 |                                 |            |
| (1–6 months)                  |                               | No, n = 26239                  |               | Lowest-risk quintile  | Reference                                                      |                                 |                                 |            |

|                   |                                                  |                                             |                                                  |                                 |                                                  |                                     |
|-------------------|--------------------------------------------------|---------------------------------------------|--------------------------------------------------|---------------------------------|--------------------------------------------------|-------------------------------------|
| Netherlands       | Everyone                                         | van Boxtel-Wilms 2016 [49]<br>(3 months)    | Descriptive                                      | Yes                             | Anaemia, n = 5, events = 5                       |                                     |
|                   |                                                  |                                             |                                                  | No                              | No anaemia, n = 545, events = 0                  |                                     |
| Spain             | Everyone                                         | Cubiella 2016 [12] <sup>4</sup><br>(1 week) | Odds ratio                                       | Yes, n = 214                    | <10 g/dL                                         | OR = 4.8 (95% CI = 2.2, 10.3)       |
|                   |                                                  |                                             |                                                  | No, n = 1358                    | 10–12 g/dL                                       | OR = 1.8 (95% CI = 1.1, 3.0)        |
|                   |                                                  |                                             |                                                  |                                 | >12 g/dL                                         | Reference                           |
| Turkey            | Everyone                                         | Ay 2015 [3]<br>(1 week)                     | T-test                                           | Yes, n = 30                     |                                                  | Mean = 13.5 g/dL (SD = 1.1) ≥0.05   |
|                   |                                                  |                                             |                                                  | Polyp, n = 110                  |                                                  | Mean = 13.9 g/dL (SD = 1.1)         |
|                   |                                                  | Cakmak 2017 [9]<br>(6 months)               | T-test                                           | Yes, n = 59                     |                                                  | Mean = 11.9 g/dL (SD = 2.2) <0.001  |
|                   |                                                  |                                             |                                                  | No, n = 59                      |                                                  | Mean = 14.4 g/dL (SD = 1.1)         |
|                   |                                                  | Firat 2016 [14]<br>(At diagnosis)           | Chi-squared                                      | Yes                             |                                                  | 0.002                               |
|                   |                                                  | No                                          |                                                  |                                 |                                                  |                                     |
|                   |                                                  | Kilincalp 2015 [28]<br>(At diagnosis)       | T-test                                           | Yes, n = 144                    |                                                  | Mean = 11.6 g/dL (SD = 2.20) <0.001 |
|                   |                                                  |                                             |                                                  | No, n = 143                     |                                                  | Mean = 14.2 g/dL (SD = 1.17)        |
| UK                | Everyone                                         | Acher 2003 [1] <sup>5</sup><br>(6 months)   | Descriptive                                      | Yes                             | <10.1 g/dl, n>5000, events = 112                 |                                     |
|                   |                                                  |                                             |                                                  | No                              | ≥10.1 g/dL, events = 274                         |                                     |
|                   |                                                  | Mashlab 2018 [35]<br>(2 weeks)              | Chi-squared                                      | Yes, n = 60                     | Men<130 g/L, Women<120 g/L, n = 388, events = 39 |                                     |
| No, n = 955       | Men≥130 g/L, Women≥120 g/L, n = 627, events = 21 |                                             |                                                  |                                 |                                                  |                                     |
| Mashlab 2018 [35] | Odds ratio                                       | Yes, n = 60                                 | Men<130 g/L, Women<120 g/L, n = 388, events = 39 | OR = 3.22 (95% CI = 1.87, 5.57) |                                                  |                                     |

|          |                                                   |             |               |                                                                |                                 |       |
|----------|---------------------------------------------------|-------------|---------------|----------------------------------------------------------------|---------------------------------|-------|
|          | (2 weeks)                                         |             | No, n = 955   | Men $\geq$ 130 g/L, Women $\geq$ 120 g/L, n = 627, events = 21 | Reference                       |       |
|          | Mashlab 2018 [35] <sup>6</sup>                    | Odds ratio  | Yes, n = 60   | Men $<$ 130 g/L, Women $<$ 120 g/L, n = 388, events = 39       | OR = 2.77 (95% CI = 1.55, 4.95) |       |
|          | (2 weeks)                                         |             | No, n = 955   | Men $\geq$ 130 g/L, Women $\geq$ 120 g/L, n = 627, events = 21 | Reference                       |       |
|          | Raje 2007 [42] <sup>7</sup>                       | Descriptive | Yes           | Men $<$ 11 g/dL, Women $<$ 10 g/dL, n = 142, events = 9        |                                 |       |
|          | (1–2 months)                                      |             | No            |                                                                |                                 |       |
| Centre A | Panagiotopoulou 2014 [38]                         | Chi-squared | Yes, n = 30   | Anaemia, n = 105, events = 16                                  |                                 | 0.434 |
|          | (3 months)                                        |             | No, n = 199   | No anaemia, n = 124, events = 14                               |                                 |       |
|          | Panagiotopoulou 2014 [38]                         | Odds ratio  | Yes, n = 30   | Anaemia, n = 105, events = 16                                  | OR = 1.4 (95% CI = 0.7, 3.1)    |       |
|          | (3 months)                                        |             | No, n = 199   | No anaemia, n = 124, events = 14                               | Reference                       |       |
| Centre B | Panagiotopoulou 2014 [38]                         | Chi-squared | Yes, n = 76   | Anaemia, n = 257, events = 35                                  |                                 | 0.103 |
|          | (3 months)                                        |             | No, n = 613   | No anaemia, n = 432, events = 41                               |                                 |       |
|          | Panagiotopoulou 2014 [38]                         | Odds ratio  | Yes, n = 76   | Anaemia, n = 257, events = 35                                  | OR = 1.5 (95% CI = 0.9, 2.4)    |       |
|          | (3 months)                                        |             | No, n = 613   | No anaemia, n = 432, events = 41                               | Reference                       |       |
|          | Panagiotopoulou 2014 [38] <sup>8</sup> (3 months) | Odds ratio  | Yes, n = 76   | Anaemia, n = 257, events = 35                                  | OR = 1.5 (95% CI = 0.9, 2.5)    |       |
|          |                                                   |             | No, n = 613   | No anaemia, n = 432, events = 41                               | Reference                       |       |
| Males    | Schneider 2018 [43]                               | Odds ratio  | Yes, n = 2551 | $\leq$ 9 g/dL, n = 243, events = 243                           | X                               |       |
|          | (6 months)                                        |             | No, n = 1113  | 9–9.9 g/dL, n = 207, events = 193                              | OR = 10.3 (95% CI = 5.9, 17.8)  |       |

|         |                                  |            |               |                                       |                                  |
|---------|----------------------------------|------------|---------------|---------------------------------------|----------------------------------|
|         |                                  |            |               | 10–10.9 g/dL, n = 284, events = 255   | OR = 6.5 (95% CI = 4.4, 9.7)     |
|         |                                  |            |               | 11–11.9 g/dL, n = 379, events = 296   | OR = 2.7 (95% CI = 2.0, 3.4)     |
|         |                                  |            |               | 12–12.9 g/dL, n = 497, events = 384   | OR = 2.5 (95% CI = 2.0, 3.2)     |
|         |                                  |            |               | 13–15.9 g/dL, n = 1834, events = 1052 | Reference                        |
|         |                                  |            |               | ≥16 g/dL, n = 180, events = 88        | OR = 0.71 (95% CI = 0.52, 0.97)  |
|         | Schneider 2018 [43] <sup>9</sup> | Odds ratio | Yes, n = 2551 | ≤9 g/dL, n = 243, events = 243        | OR = 95.9 (95% CI = 23.5, 391.8) |
|         | (6 months)                       |            | No, n = 1113  | 9–9.9 g/dL, n = 207, events = 193     | OR = 12.2 (95% CI = 6.8, 21.8)   |
|         |                                  |            |               | 10–10.9 g/dL, n = 284, events = 255   | OR = 8.6 (95% CI = 5.3, 13.8)    |
|         |                                  |            |               | 11–11.9 g/dL, n = 379, events = 296   | OR = 3.1 (95% CI = 2.3, 4.2)     |
|         |                                  |            |               | 12–12.9 g/dL, n = 497, events = 384   | OR = 2.9 (95% CI = 2.2, 3.8)     |
|         |                                  |            |               | 13–15.9 g/dL, n = 1834, events = 1052 | Reference                        |
|         |                                  |            |               | ≥16 g/dL, n = 180, events = 88        | OR = 0.7 (95% CI = 0.5, 1.04)    |
| Females | Schneider 2018 [43]              | Odds ratio | Yes, n = 2089 | ≤9 g/dL, n = 341, events = 336        | OR = 70.6 (95% CI = 29, 172.2)   |
|         | (6 months)                       |            | No, n = 1086  | 9–9.99 g/dL, n = 368, events = 252    | OR = 16.5 (95% CI = 9.8, 27.8)   |
|         |                                  |            |               | 10–10.9 g/dL, n = 379, events = 333   | OR = 7.6 (95% CI = 5.5, 10.6)    |
|         |                                  |            |               | 11–11.9 g/dL, n = 442, events = 326   | OR = 3.0 (95% CI = 2.3, 3.8)     |

|                                                |          |                                  |             |               |                                                       |                                  |        |
|------------------------------------------------|----------|----------------------------------|-------------|---------------|-------------------------------------------------------|----------------------------------|--------|
|                                                |          |                                  |             |               | 12–12.9 g/dL, n = 667, events = 365                   | OR = 1.5 (95% CI = 1.2, 1.8)     |        |
|                                                |          |                                  |             |               | 13–15.9 g/dL, n = 978, events = 477                   | Reference                        |        |
|                                                |          |                                  |             |               | ≥16 g/dL, n = 0                                       | X                                |        |
|                                                |          | Schneider 2018 [43] <sup>9</sup> | Odds ratio  | Yes, n = 2089 | ≤9 g/dL, n = 341, events = 336                        | OR = 84.6 (95% CI = 30.4, 235.2) |        |
|                                                |          | (6 months)                       |             | No, n = 1086  | 9–9.99 g/dL, n = 368, events = 252                    | OR = 23.3 (95% CI = 12.4, 43.5)  |        |
|                                                |          |                                  |             |               | 10–10.9 g/dL, n = 379, events = 333                   | OR = 10.6 (95% CI = 6.9, 16.1)   |        |
|                                                |          |                                  |             |               | 11–11.9 g/dL, n = 442, events = 326                   | OR = 3.7 (95% CI = 2.7, 5.1)     |        |
|                                                |          |                                  |             |               | 12–12.9 g/dL, n = 667, events = 365                   | OR = 1.5 (95% CI = 1.2, 1.9)     |        |
|                                                |          |                                  |             |               | 13–15.9 g/dL, n = 978, events = 477                   | Reference                        |        |
|                                                |          |                                  |             |               | ≥16 g/dL, n = 0                                       | X                                |        |
| USA                                            | Everyone | Spell 2004 [46]                  | Chi-squared | Yes, n = 225  | Men < 13 g/dL, Women < 11 g/dL, n = 160, events = 130 |                                  | <0.001 |
|                                                |          | (6 months)                       |             | No, n = 487   | Men ≥ 13 g/dL, Women ≥ 11 g/dL, n = 552, events = 95  |                                  |        |
|                                                |          | Spell 2004 [46]                  | Odds ratio  | Yes, n = 225  | Men < 13 g/dL, Women < 11 g/dL, n = 160, events = 130 | OR = 20.8 (95% CI = 13.2, 32.8)  |        |
|                                                |          | (6 months)                       |             | No, n = 487   | Men ≥ 13 g/dL, Women ≥ 11 g/dL, n = 552, events = 95  | Reference                        |        |
| <b>6 &lt; outcome time window ≤ 12 months:</b> |          |                                  |             |               |                                                       |                                  |        |
| UK                                             | Everyone | Acher 2003 [1] <sup>5</sup>      | Descriptive | Yes           | <10.1 g/dL, n > 5000, events = 28                     |                                  |        |
|                                                |          | (6–12 months)                    |             | No            | ≥10.1 g/dL, events = 274                              |                                  |        |
|                                                |          | Boursi 2016 [8]                  | Odds ratio  | Yes, n = 4929 | <i>Modelled as continuous</i>                         | OR = 0.67 (95% CI = 0.66, 0.69)  | <0.001 |
|                                                |          | (1 year)                         |             | No, n = 11491 |                                                       |                                  |        |



|                                               |             |                                |                                                                                                                                                                                                                                                             |                                                                                                                                                                                                                         |
|-----------------------------------------------|-------------|--------------------------------|-------------------------------------------------------------------------------------------------------------------------------------------------------------------------------------------------------------------------------------------------------------|-------------------------------------------------------------------------------------------------------------------------------------------------------------------------------------------------------------------------|
| Boursi 2016 [8] <sup>10</sup><br>(1 year)     | Odds ratio  | Yes, n = 3375<br>No, n = 8560  | Modelled as fractional<br>polynomials (powers: 2, 2)                                                                                                                                                                                                        | OR = 0.02*Hb <sup>2</sup><br>OR = 32.17*Hb <sup>2</sup> ×<br>ln(Hb)                                                                                                                                                     |
| Hamilton 2009 [19]<br>(2 years)               | Odds ratio  | Yes, n = 5477<br>No, n = 38314 | <12 g/dL, n = 3227, events =<br>1424<br>≥12 g/dL, n = 40564, events =<br>4053                                                                                                                                                                               | OR = 7.11 (95% CI<br>= 6.59, 7.68)<br>Reference                                                                                                                                                                         |
| Hamilton 2009 [19] <sup>11</sup><br>(2 years) | Odds ratio  | Yes<br>No                      | <9 g/dL<br>9–9.9 g/dl<br>10–10.9 g/dl<br>11–11.9 g/dl<br>12–12.9 g/dl<br>≥12 g/dL                                                                                                                                                                           | OR = 18 (95% CI =<br>14, 25)<br>OR = 9.3 (95% CI<br>= 7.1, 12)<br>OR = 5.9 (95% CI<br>= 4.8, 7.2)<br>OR = 2.8 (95% CI<br>= 2.4, 3.2)<br>OR = 1.7 (95% CI<br>= 1.5, 1.9)<br>Reference                                    |
| Lawrenson 2006 [31]<br>(1 year)               | Rate ratios | Yes<br>No                      | Anaemia<br>No anaemia                                                                                                                                                                                                                                       |                                                                                                                                                                                                                         |
| Marshall 2011 [34]<br>(2 years)               | Odds ratio  | Yes, n = 5477<br>No, n = 38314 | <9 g/dL, n = 487, events = 385<br>9–9.999 g/dL, n = 421, events =<br>268<br>10–10.999 g/dL, n = 771,<br>events = 354<br>11–11.999 g/dL, n = 1548,<br>events = 417<br>12–12.999 g/dL, n = 3001,<br>events = 517<br>13–13.999 g/dL, n = 4284,<br>events = 573 | OR = 50.9 (95% CI<br>= 40.2, 64.5)<br>OR = 23.5 (95% CI<br>= 18.9, 29.1)<br>OR = 12.3 (95% CI<br>= 10.5, 14.4)<br>OR = 5.4 (95% CI<br>= 4.7, 6.1)<br>OR = 3.0 (95% CI<br>= 2.7, 3.3)<br>OR = 2.0 (95% CI<br>= 1.8, 2.2) |

|       |                                  |            |               | ≥14 g/dL, n = 33279, events = 2963                | Reference                        |
|-------|----------------------------------|------------|---------------|---------------------------------------------------|----------------------------------|
|       | Marshall 2011 [34]               | Odds ratio | Yes, n = 5477 | Men <12 g/dL, Women <11, n = 2211, events = 1181  | OR = 11.4 (95% CI = 10.3, 12.6)  |
|       | (2 years)                        |            | No, n = 38314 | Men ≥12 g/dL, Women ≥11, n = 41580, events = 4296 | Reference                        |
|       | Marshall 2011 [34] <sup>12</sup> | Odds ratio | Yes, n = 5477 | <9 g/dL, n = 487, events = 385                    | OR = 15.9 (95% CI = 11.8, 21.6)  |
|       | (2 years)                        |            | No, n = 38314 | 9–9.999 g/dL, n = 421, events = 268               | OR = 8.08 (95% CI = 6.13, 10.65) |
|       |                                  |            |               | 10–10.999 g/dL, n = 771, events = 354             | OR = 5.18 (95% CI = 4.19, 6.39)  |
|       |                                  |            |               | 11–11.999 g/dL, n = 1548, events = 417            | OR = 2.54 (95% CI = 2.16, 2.99)  |
|       |                                  |            |               | 12–12.999 g/dL, n = 3001, events = 517            | OR = 1.63 (95% CI = 1.42, 1.87)  |
|       |                                  |            |               | 13–13.999 g/dL, n = 4284, events = 573            | OR = 1.33 (95% CI = 1.18, 1.50)  |
|       |                                  |            |               | ≥14 g/dL, n = 33279, events = 2963                | Reference                        |
|       | Stapley 2006 [47]                | Odds ratio | Yes           | <9 g/dL, n = 73, events = 39                      | 0.73                             |
|       | (1 year)                         |            | No            | ≥9 g/dL, n = 276                                  | Reference                        |
| Males | Hamilton 2008 [18]               | Odds ratio | Yes, n = 1604 | <9 g/dL, n = 225, events = 178                    | OR = 19.4 (95% CI = 14.0, 27.0)  |
|       | (1 year)                         |            | No, n = 5226  | 9–9.9 g/dL, n = 167, events = 118                 | OR = 12.4 (95% CI = 8.8, 17.4)   |
|       |                                  |            |               | 10–10.9 g/dL, n = 260, events = 129               | OR = 5.1 (95% CI = 3.9, 6.5)     |
|       |                                  |            |               | 11–11.9 g/dL, n = 464, events = 171               | OR = 3.0 (95% CI = 2.4, 3.7)     |
|       |                                  |            |               | 12–12.9 g/dL, n = 775, events = 203               | OR = 1.8 (95% CI = 1.5, 2.2)     |

>12.9 g/dL, n = 4939, events = 805

Reference

|         |                                                |              |                 |                                                          |                                 |       |
|---------|------------------------------------------------|--------------|-----------------|----------------------------------------------------------|---------------------------------|-------|
|         | Hippisley-Cox 2012 [21]<br>13<br>(2 years)     | Hazard ratio | Yes             | <11 g/dL                                                 | HR = 3.33 (95% CI = 2.86, 3.87) |       |
|         |                                                |              | No              | ≥11 g/dL                                                 | Reference                       |       |
|         | Hippisley-Cox 2013 [22]<br>14, 15<br>(2 years) | Odds ratio   | Yes, n = 3250   | <11 g/dL                                                 | OR = 4.08 (95% CI = 3.65, 4.57) |       |
|         |                                                |              | No, n = 1240550 | ≥11 g/dL                                                 | Reference                       |       |
|         | Stapley 2006 [47]<br>(1 year)                  | Odds ratio   | A               | 10–12.9 g/dL, n = 80, Stage A = 3, B = 3, C = 11, D = 10 | OR = 2.2 (95% CI = 1.2, 4.3)    | 0.021 |
|         |                                                |              | B               | ≥12.9 g/dL, n = 269                                      | Reference                       |       |
|         |                                                |              | C               |                                                          |                                 |       |
|         |                                                |              | D               |                                                          |                                 |       |
| Females | Hamilton 2008 [18]<br>(1 year)                 | Odds ratio   | Yes, n = 1579   | <9 g/dL, n = 257, events = 221                           | OR = 40.0 (95% CI = 27.8, 57.7) |       |
|         |                                                |              | No, n = 5226    | 9–9.9 g/dL, n = 231, events = 146                        | OR = 14.0 (95% CI = 3.3, 59.3)  |       |
|         |                                                |              |                 | 10–10.9 g/dL, n = 451, events = 226                      | OR = 6.6 (95% CI = 5.3, 8.1)    |       |
|         |                                                |              |                 | 11–11.9 g/dL, n = 854, events = 238                      | OR = 2.5 (95% CI = 2.1, 3.0)    |       |
|         |                                                |              |                 | 12–12.9 g/dL, n = 1626, events = 289                     | OR = 1.4 (95% CI = 1.2, 1.7)    |       |
|         |                                                |              |                 | >12.9 g/dL, n = 3451, events = 459                       | Reference                       |       |
|         | Hippisley-Cox 2012 [21]<br>16<br>(2 years)     | Hazard ratio | Yes             | <11 g/dL                                                 | HR = 3.26 (95% CI = 2.84, 3.74) |       |
|         |                                                |              | No              | ≥11 g/dL                                                 | Reference                       |       |
|         | Hippisley-Cox 2013 [23]<br>14, 15<br>(2 years) | Odds ratio   | Yes, n = 2607   | <11 g/dL                                                 | OR = 4.37 (95% CI = 3.94, 4.86) |       |
|         |                                                |              | No, n = 1217648 | ≥11 g/dL                                                 | Reference                       |       |

12 < outcome time window ≤ 36 months:

|    |          |                                  |            |               |                                                        |                                  |
|----|----------|----------------------------------|------------|---------------|--------------------------------------------------------|----------------------------------|
| UK | Everyone | Cross 2019 [11]                  | Odds ratio | Yes, n = 337  | Men < 13 g/dL, Women < 12 g/dL, n = 1660, events = 184 | OR = 2.39 (95% CI = 1.91, 2.98)  |
|    |          | (3 years)                        |            | No, n = 4405  | Men ≥ 13 g/dL, Women ≥ 12 g/dL, n = 3082, events = 153 | Reference                        |
|    |          | Cross 2019 [11]                  | Yield      | Yes           | Anaemia with distal cancer                             | Yield = 6.4%                     |
|    |          | (3 years)                        |            | No            | Anaemia with proximal cancer                           | Yield = 4.7%                     |
|    |          |                                  |            |               | No anaemia with distal cancer                          | Yield = 4.3%                     |
|    |          |                                  |            |               | No anaemia with proximal cancer                        | Yield = 0.6%                     |
|    |          | Hamilton 2005 [17]               | Odds ratio | Yes, n = 349  | < 10 g/dl, n = 61, events = 40                         | OR = 12.4 (95% CI = 7.2, 21.38)  |
|    |          | (2 years)                        |            | No, n = 1744  | 10–11.9 g/dl, n = 87, events = 38                      | OR = 5.05 (95% CI = 3.24, 7.87)  |
|    |          |                                  |            |               | 12–12.9 g/dl, n = 37, events = 17                      | OR = 5.5 (95% CI = 2.7, 10.7)    |
|    |          |                                  |            |               | ≥ 13 g/dL, n = 1908, events = 254                      | Reference                        |
|    |          | Hamilton 2005 [17] <sup>17</sup> | Odds ratio | Yes, n = 349  | < 10 g/dl, n = 61, events = 40                         | OR = 13.0 (95% CI = 6.2, 28.0)   |
|    |          | (2 years)                        |            | No, n = 1744  | 10–11.9 g/dl, n = 87, events = 38                      | OR = 4.3 (95% CI = 2.1, 9.0)     |
|    |          |                                  |            |               | 12–12.9 g/dl, n = 37, events = 17                      | OR = 2.5 (95% CI = 0.95, 6.8)    |
|    |          |                                  |            |               | ≥ 13 g/dL, n = 1908, events = 254                      | Reference                        |
|    |          | Thompson 2017 [48]               | Odds ratio | Yes           | IDA                                                    | OR = 6.09 (95% CI = 5.04, 7.35)  |
|    |          | (3 years)                        |            | No            | No IDA                                                 | Reference                        |
|    |          | Thompson 2017 [48] <sup>18</sup> | Odds ratio | Yes, n = 990  | IDA                                                    | OR = 8.38 (95% CI = 5.10, 16.05) |
|    |          | (3 years)                        |            | No, n = 16413 | No IDA                                                 | Reference                        |

| Outcome time window > 36 months:                                    |          |                                                  |                 |                                 |                                                                                                               |                                            |
|---------------------------------------------------------------------|----------|--------------------------------------------------|-----------------|---------------------------------|---------------------------------------------------------------------------------------------------------------|--------------------------------------------|
| Taiwan                                                              | Everyone | Hung 2015 [26]<br>(1–10 years)                   | Incidence ratio | Yes<br>No                       | IDA, n = 32390, events = 171<br>No IDA                                                                        | SIR = 1.48 (95% CI = 1.27, 1.72)           |
|                                                                     |          | Hung 2015 [26]<br>(1–10 years)                   | Incidence ratio | Yes<br>No                       | IDA, n = 32390, CRC = 54<br>No IDA                                                                            | SIR = 1.14 (95% CI = 0.85, 1.48)           |
| UK                                                                  | Everyone | Pilling 2018 [40] <sup>19</sup><br>(4.5 years)   | Hazard ratio    | Yes, n = 914<br>No, n = 237,302 | <i>Modelled as continuous</i>                                                                                 | sHR = 0.97 (95% CI = 0.87, 1.08)           |
|                                                                     |          | Pilling 2018 [40] <sup>19</sup><br>(4.5–9 years) | Hazard ratio    | Yes, n = 413<br>No, n = 237,451 | <i>Modelled as continuous</i>                                                                                 | sHR = 1.01 (95% CI = 0.87, 1.18)           |
| OUTCOME WINDOW NOT CATEGORISABLE: > 3-month risk of CRC diagnosis:  |          |                                                  |                 |                                 |                                                                                                               |                                            |
| Iran                                                                | Everyone | Bafandeh 2008 [5]<br>(>3 months)                 | Odds ratio      | Yes<br>Polyp                    | Unexplained anaemia, n = 35<br>No unexplained anaemia, n = 445                                                | 0.004<br>Reference                         |
|                                                                     |          | Bafandeh 2008 [5] <sup>20</sup><br>(>3 months)   | Odds ratio      | Yes<br>Polyp                    | Unexplained anaemia, n = 35, events = 5<br>No unexplained anaemia, n = 445                                    | 0.006<br>Reference                         |
| OUTCOME WINDOW NOT CATEGORISABLE: > 12-month risk of CRC diagnosis: |          |                                                  |                 |                                 |                                                                                                               |                                            |
| Netherlands                                                         | Everyone | Fijten 1995 [13]<br>(> 1 year)                   | Chi-squared     | Yes, n = 6<br>No, n = 219       | Men<8.5 mmol/L, Women<7.5 mmol/L, n = 14, events = 2<br>Men≥8.5 mmol/L, Women≥7.5 mmol/L, n = 211, events = 4 | <0.01                                      |
|                                                                     |          | Fijten 1995 [13]<br>(> 1 year)                   | Odds ratio      | Yes, n = 6<br>No, n = 219       | Low, n = 14, events = 2<br>High, n = 211, events = 4                                                          | OR = 8.6 (95% CI = 1.4, 51.9)<br>Reference |
| UK                                                                  | Everyone | Acher 2003 [1] <sup>5</sup><br>(> 1 year)        | Descriptive     | Yes<br>No                       | <10.1 g/dl, n>5000, events = 26<br>≥10.1 g/dL, events = 274                                                   |                                            |
| Unspecified outcome time window:                                    |          |                                                  |                 |                                 |                                                                                                               |                                            |

|             |          |                                    |             |               |                                                        |                                |
|-------------|----------|------------------------------------|-------------|---------------|--------------------------------------------------------|--------------------------------|
| Italy       | Everyone | Panzuto 2003 [39] <sup>21</sup>    | Odds ratio  | Yes, n = 41   | Men<14 g/dL, Women<12 g/dL, n = 69, events = 28        | OR = 10.4 (95% CI = 4.9, 21.7) |
|             |          |                                    |             | No, n = 239   | Men≥14 g/dL, Women≥12 g/dL, n = 211, events = 13       | Reference                      |
|             |          | Panzuto 2003 [39] <sup>22,23</sup> | Odds ratio  | Yes, n = 41   | Men<14 g/dL, Women<12 g/dL, n = 69, events = 28        | OR = 8.8 (95% CI = 3.9–19.8)   |
|             |          |                                    |             | No, n = 239   | Men≥14 g/dL, Women≥12 g/dL, n = 211, events = 13       | Reference                      |
| Japan       | Everyone | Nakama 2000 [37] <sup>24</sup>     | Chi-squared | Yes, n = 96   | Men<12.5 g/dL, Women<11.5 g/dL, n = 1132, events = 31  | <0.05                          |
|             |          |                                    |             | No, n = 17568 | Men≥12.5 g/dL, Women≥11.5 g/dL, n = 16532, events = 65 |                                |
|             |          | Nakama 2000 [37] <sup>24</sup>     | Odds ratio  | Yes, n = 96   | Men<12.5 g/dL, Women<11.5 g/dL, n = 1132, events = 31  | OR = 7.1 (95% CI = 4.6, 11.0)  |
|             |          |                                    |             | No, n = 17568 | Men≥12.5 g/dL, Women≥11.5 g/dL, n = 16532, events = 65 | Reference                      |
| Switzerland | Everyone | Naef 1999 [36]                     | Descriptive | Yes<br>Polyp  | Anaemic, n = 23, events = 16<br>Non-anaemic, n = 31    |                                |

Abbreviations: CRC = colorectal cancer, OR = odds ratio, RR = risk ratio, SIR = standardised incidence ratios. <sup>1</sup>Multivariable effect estimate, adjusted for: age, sex, serum iron, transferrin, saturation index, and ferritin. <sup>2</sup>Multivariable effect estimate, adjusted for: mean corpuscular volume, neutrophil count, platelets, red blood cell distribution width, alanine aminotransferase, protein, iron, ferritin. <sup>3</sup>Multivariable effect estimate, adjusted for: mean corpuscular volume, monocyte count, platelets, alkaline phosphatase, alanine aminotransferase, aspartate aminotransferase, iron, ferritin. <sup>4</sup>Multivariable effect estimate, adjusted for: change in bowel habit, rectal bleeding, benign anorectal lesion, rectal mass, serum CEA, Faecal haemoglobin, previous colonoscopy, aspirin use, sex, age. <sup>5</sup>In the presence of serum ferritin<12 ng/ml and mean corpuscular volume<78 fL. <sup>6</sup>Multivariable effect estimate, adjusted for: age, sex. <sup>7</sup>In the presence of serum ferritin<12 ng/ml and mean corpuscular volume<78 fL. <sup>8</sup>Multivariable effect estimate, adjusted for: sex, age, change in bowel habit, weight loss, bleeding per rectum, mucus per rectum, abdominal mass, abdominal fullness, lesion on digital rectal examination, anal lesion, abdominal distension, abdominal pain, family history, previous polyps, FOBT. <sup>9</sup>Multivariable effect estimate, adjusted for: BMI, smoking status, history of hypertension, diabetes, aspirin or NSAIDs use, vitamin K antagonists, platelet inhibitors. <sup>10</sup>In the presence of mean corpuscular volume<78 fL and/or mean corpuscular haemoglobin concentration<32 g/dL. <sup>11</sup>Multivariable effect estimate, adjusted for: mean corpuscular volume, white blood cell count, neutrophil-lymphocyte ratio, platelets, sex, previous metformin prescriptions, previous prescriptions for oral hypoglycemic drugs other than metformin. <sup>12</sup>Multivariable effect estimate, adjusted for: rectal bleeding, change in bowel habit, abdominal pain, diarrhoea, constipation, weight loss, mean corpuscular volume. <sup>13</sup>Multivariable effect estimate, adjusted for: constipation, diarrhoea, change in bowel habit, flatulence, Irritable bowel syndrome, abdominal pain/antispasmodic, rectal bleeding, mean corpuscular volume, weight loss, deep venous thrombosis/pulmonary embolism, diabetes, obesity. <sup>14</sup>Multivariable effect estimate, adjusted for: alcohol status, family history of gastrointestinal cancer, current rectal bleeding, current abdominal pain, current appetite loss, current weight

loss, change in bowel habit in previous year. <sup>15</sup>Effect estimates are from multinomial logistic regression model, where the outcomes are different types of cancer. The estimates for the colorectal cancer vs no cancer are reported here. <sup>16</sup>Multivariable effect estimate, adjusted for: family history gastrointestinal cancer, alcohol status, abdominal distension, abdominal pain, appetite loss, rectal bleeding, weight loss, change in bowel habit, constipation. <sup>17</sup>Multivariable effect estimate, adjusted for: family history of gastrointestinal cancer, current rectal bleeding, current abdominal pain, current appetite loss, current weight loss. <sup>18</sup>Multivariable effect estimate, adjusted for: rectal bleeding, weight loss, number of episodes of abdominal pain, constipation, number of episodes of diarrhoea, rectal disease on rectal examination, tenderness on palpation of abdomen, positive faecal occult blood, blood sugar. <sup>19</sup>Multivariable effect estimate, adjusted for: age, sex, symptom combinations, physical signs, characteristics of rectal bleeding, characteristics of change in bowel habit, other characteristics of bowel cancer. <sup>20</sup>Multivariable effect estimate, adjusted for: age, sex, smoking status, highest education level attained, mean corpuscular volume, red blood cell distribution width. <sup>21</sup>Multivariable effect estimate, adjusted for: age, gender, duration of symptoms. <sup>22</sup>In the presence of ferritin<30 and mean corpuscular volume<80 fL. <sup>23</sup>Multivariable effect estimate, adjusted for: age, weight loss. <sup>24</sup>In the presence of serum ferritin<45.5 µg/L and serum iron<40 µg/L

**Table S6:** Haematocrit (or packed cell volume) for colorectal cancer, with analyses sorted by outcome time window, country, and strata

| Country                                        | Strata   | Article                               | Analysis type | CRC outcome groups and no. per group | Blood level categories and no. per group                   | Analysis estimates                                                  | <i>p</i> -value |
|------------------------------------------------|----------|---------------------------------------|---------------|--------------------------------------|------------------------------------------------------------|---------------------------------------------------------------------|-----------------|
| <b>6 &lt; outcome time window ≤ 12 months:</b> |          |                                       |               |                                      |                                                            |                                                                     |                 |
| UK                                             | Everyone | Boursi 2016 [8] (1 year)              | Odds ratio    | Yes, n = 4929<br>No, n = 11311       | <i>Modelled as continuous</i>                              | OR = 0.97 (95% CI = 0.95, 0.98)                                     | <0.001          |
|                                                |          | Boursi 2016 [8] <sup>1</sup> (1 year) | Odds ratio    | Yes, n = 4929<br>No, n = 11311       | <i>Modelled as fractional polynomials (powers: -1, -1)</i> | OR = 0.681*Hc <sup>-1</sup><br>OR = 0.894*Hc <sup>-1</sup> × ln(Hc) | <0.001          |

Abbreviations: CRC = colorectal cancer, OR = odds ratio, Hc = haematocrit. <sup>1</sup>Multivariable effect estimate, adjusted for: mean corpuscular volume, lymphocyte count, neutrophil-lymphocyte ratio.



**Table S7:** Mean corpuscular volume for colorectal cancer, with analyses sorted by outcome time window, country, and strata

| Country                                       | Strata   | Article                                       | Analysis type  | CRC outcome groups and no. per group      | Blood level categories and no. per group      | Analysis estimates                                     | P-value   |
|-----------------------------------------------|----------|-----------------------------------------------|----------------|-------------------------------------------|-----------------------------------------------|--------------------------------------------------------|-----------|
| <b>0 &lt; outcome time window ≤ 6 months:</b> |          |                                               |                |                                           |                                               |                                                        |           |
| Israel                                        | Males    | Goshen 2017 [16]<br>(1–6 months)              | T-test         | Yes, n = 936<br>No, n = 28491             |                                               | Mean = 85.7 fL<br>Mean = 88.9 fL                       | <0.0001   |
|                                               |          |                                               | Risk ratio     | Yes<br>No                                 | Highest-risk quintile<br>Lowest-risk quintile | RR = 3.44 (95% CI = 2.7, 4.87)<br>Reference            |           |
|                                               |          | Goshen 2017 [16] <sup>1</sup><br>(1–6 months) | Risk ratio     | Yes, n = 936<br>No, n = 28491             | Highest-risk quintile<br>Lowest-risk quintile | RR = 2.98 (95% CI = 2.58, 3.42)<br>Reference           | <0.001    |
|                                               | Females  | Goshen 2017 [16]<br>(1–6 months)              | T-test         | Yes, n = 819<br>No, n = 26239             |                                               | Mean = 84.5 fL<br>Mean = 88.6 fL                       | <0.0001   |
|                                               |          |                                               | Risk ratio     | Yes<br>No                                 | Highest-risk quintile<br>Lowest-risk quintile | RR = 3.52 (95% CI = 2.84, 4.39)<br>Reference           |           |
|                                               |          | Goshen 2017 [16] <sup>2</sup><br>(1–6 months) | Risk ratio     | Yes, n = 819<br>No, n = 26239             | Highest-risk quintile<br>Lowest-risk quintile | RR = 3.04 (95% CI = 2.7, 3.54)<br>Reference            | <0.001    |
| Spain                                         | Everyone | Cubiella 2016 [12]<br>(1 week)                | Mann-Whitney U | Yes, n = 214<br>No, n = 1358              |                                               | Median = 89.1 fL<br>Median = 90.8 fL                   | <0.001    |
| Turkey                                        | Everyone | Ay 2015 [3]<br>(1 week)                       | T-test         | Yes, n = 30<br>Polyp, n = 110             |                                               | Mean = 85.2 fL (SD = 4.8)<br>Mean = 86.7 fL (SD = 4.9) | ≥0.05     |
| UK                                            | Everyone | Raje 2007 [42] <sup>3</sup><br>(1–2 months)   | Descriptive    | Yes<br>No                                 | <78 fL, n = 142, events = 9<br>≥78 fL         |                                                        |           |
|                                               |          |                                               |                | Acher 2003 [1] <sup>4</sup><br>(6 months) |                                               | Descriptive                                            | Yes<br>No |
|                                               | Males    | Schneider 2018 [43]                           | Odds ratio     | Yes, n = 544                              | ≤80 fL, n = 561, events = 544                 | OR = 18.7 (95% CI = 11.5, 30.6)                        |           |

|         |                                  |            |               |                                   |                                 |
|---------|----------------------------------|------------|---------------|-----------------------------------|---------------------------------|
|         | (6 months)                       |            | No, n = 3000  | 81–85 fL, n = 440, events = 364   | OR = 2.80 (95% CI = 2.15, 3.65) |
|         |                                  |            |               | 86–95 fL, n = 1944, events = 1226 | Reference                       |
|         |                                  |            |               | 96–100 fL, n = 475, events = 260  | OR = 0.7 (95% CI = 0.6, 0.9)    |
|         |                                  |            |               | >100 fL, n = 124, events = 63     | OR = 0.6 (95% CI = 0.4, 0.9)    |
|         | Schneider 2018 [43] <sup>5</sup> | Odds ratio | Yes, n = 2457 | ≤80 fL, n = 561, events = 544     | OR = 25.5 (95% CI = 13.9, 46.8) |
|         | (6 months)                       |            | No, n = 1087  | 81–85 fL, n = 440, events = 364   | OR = 2.8 (95% CI = 2.1, 3.8)    |
|         |                                  |            |               | 86–95 fL, n = 1944, events = 1226 | Reference                       |
|         |                                  |            |               | 96–100 fL, n = 475, events = 260  | OR = 0.7 (95% CI = 0.5, 0.8)    |
|         |                                  |            |               | >100 fL, n = 124, events = 63     | OR = 0.6 (95% CI = 0.4, 0.9)    |
| Females | Schneider 2018 [43]              | Odds ratio | Yes, n = 2089 | ≤80 fL, n = 616, events = 585     | OR = 12.8 (95% CI = 8.8, 18.7)  |
|         | (6 months)                       |            | No, n = 1086  | 81–85 fL, n = 512, events = 409   | OR = 2.7 (95% CI = 2.1, 3.4)    |
|         |                                  |            |               | 86–95 fL, n = 1499, events = 893  | Reference                       |
|         |                                  |            |               | 96–100 fL, n = 280, events = 127  | OR = 0.6 (95% CI = 0.4, 0.7)    |
|         |                                  |            |               | >100 fL, n = 82, events = 42      | OR = 0.7 (95% CI = 0.5, 1.1)    |
|         | Schneider 2018 [43] <sup>6</sup> | Odds ratio | Yes, n = 2056 | ≤80 fL, n = 616, events = 585     | OR = 11.4 (95% CI = 7.6, 17.1)  |
|         | (6 months)                       |            | No, n = 933   | 81–85 fL, n = 512, events = 409   | OR = 2.8 (95% CI = 2.1, 3.6)    |

|                                                |          |                                                      |             |                                |                                                               |                                                                      |        |
|------------------------------------------------|----------|------------------------------------------------------|-------------|--------------------------------|---------------------------------------------------------------|----------------------------------------------------------------------|--------|
|                                                |          |                                                      |             |                                | 86–95 fL, n = 1499, events = 893                              | Reference                                                            |        |
|                                                |          |                                                      |             |                                | 96–100 fL, n = 280, events = 127                              | OR = 0.5 (95% CI = 0.4, 0.6)                                         |        |
|                                                |          |                                                      |             |                                | >100 fL, n = 82, events = 42                                  | OR = 0.7 (95% CI = 0.4, 1.1)                                         |        |
| Centre B                                       |          | Panagiotopoulou 2014 [38]<br>(3 months)              | Odds ratio  | Yes, n = 17<br>No, n = 672     | <80 fL, n = 106, events = 17<br>≥80 fL                        | OR = 1.73 (95% CI = 0.96, 3.1)<br>Reference                          |        |
|                                                |          | Panagiotopoulou 2014 [38]<br><sup>2</sup> (3 months) | Odds ratio  | Yes, n = 76<br>No, n = 613     | <80 fL, n = 106, events = 17<br>≥80 fL                        | OR = 2.2 (95% CI = 1.2, 4.1)<br>Reference                            |        |
| USA                                            | Everyone | Spell 2004 [46]<br>(6 months)                        | Chi-squared | Yes, n = 225<br>No, n = 487    | <80 fL, n = 108, events = 92<br>≥80 fL, n = 604, events = 133 |                                                                      | <0.001 |
|                                                |          | Spell 2004 [46]<br>(6 months)                        | Odds ratio  | Yes, n = 92<br>No, n = 620     | <80 fL, n = 108, events = 92<br>≥80 fL, n = 604, events = 133 | OR = 20.4 (95% CI = 11.6, 35.8)<br>Reference                         |        |
| <b>6 &lt; outcome time window ≤ 12 months:</b> |          |                                                      |             |                                |                                                               |                                                                      |        |
| UK                                             | Everyone | Acher 2003 [1] <sup>4</sup><br>(6–12 months)         | Descriptive | Yes<br>No                      | <78 fL, n>5000, events = 28<br>≥78 fL, events-274             |                                                                      |        |
|                                                |          | Boursi 2016 [8]<br>(1 year)                          | Odds ratio  | Yes, n = 4929<br>No, n = 11311 | <i>Modelled as continuous</i>                                 | OR = 0.90 (95% CI = 0.89, 0.91)                                      | <0.001 |
|                                                |          | Boursi 2016 [8] <sup>7</sup><br>(1 year)             | Odds ratio  | Yes, n = 4929<br>No, n = 11311 | <i>Modelled as fractional polynomials (powers: 3, 3)</i>      | OR = 0.933*MCV <sup>3</sup><br>OR = 1.026*MCV <sup>3</sup> × ln(MCV) |        |
|                                                |          | Boursi 2016 [8] <sup>8</sup><br>(1 year)             | Odds ratio  | Yes, n = 3375<br>No, n = 8560  | <i>Modelled as fractional polynomials (powers: 3, 3)</i>      | OR = 0.971*MCV <sup>3</sup><br>OR = 1.010*MCV <sup>3</sup> × ln(MCV) |        |

|                                                 |          |                                                |              |                                 |                                                                                                               |                                                                                       |
|-------------------------------------------------|----------|------------------------------------------------|--------------|---------------------------------|---------------------------------------------------------------------------------------------------------------|---------------------------------------------------------------------------------------|
|                                                 |          | Hamilton 2008 [18]<br>(1 year)                 | Odds ratio   | Yes, n = 2951<br>No, n = 9648   | <80, n = 974<br>>= 80, n = 11625                                                                              | OR = 15.7 (95% CI =<br>13.4, 18.4)<br>Reference                                       |
| <b>12 &lt; outcome time window ≤ 36 months:</b> |          |                                                |              |                                 |                                                                                                               |                                                                                       |
| UK                                              | Everyone | Marshall 2011 [34]<br>(2 years)                | Odds ratio   | Yes, n = 5477<br>No, n = 38314  | <80, n = 1045, events = 761<br>80–84.999 fL, n = 1306,<br>events = 444<br>≥85 fL, n = 41440, events =<br>4272 | OR = 26.1 (95% CI =<br>22.4, 30.4)<br>OR = 4.95 (95% CI =<br>4.37, 5.61)<br>Reference |
|                                                 |          | Marshall 2011 [34]<br>(2 years)                | Odds ratio   | Yes, n = 5477<br>No, n = 38314  | <80 fL, n = 1045, events =<br>761<br>≥80 fL, n = 42746, events =<br>4716                                      | OR = 23.3 (95% CI =<br>20.0, 27.1)<br>Reference                                       |
|                                                 |          | Marshall 2011 [34] <sup>9</sup><br>(2 years)   | Odds ratio   | Yes, n = 5477<br>No, n = 38314  | <80, n = 1045, events = 761<br>80–84.999 fL, n = 1306,<br>events = 444<br>≥85 fL, n = 41440, events =<br>4272 | OR = 7.67 (95% CI =<br>6.23, 9.44)<br>OR = 2.71 (95% CI =<br>2.30, 3.19)<br>Reference |
|                                                 |          | Hamilton 2009 [19]<br>(2 years)                | Odds ratio   | Yes, n = 363<br>No, n = 43428   | <80, n = 1286, events = 363<br>≥80 fL, n = 42505, events =<br>5114                                            | OR = 2.86 (95% CI =<br>2.52, 3.24)<br>Reference                                       |
|                                                 |          | Hamilton 2009 [19] <sup>10</sup><br>(2 years)  | Odds ratio   | Yes<br>No                       | <80 fL<br>≥80 fL                                                                                              | OR = 6.5 (95% CI =<br>5.3, 7.9)<br>Reference                                          |
| <b>Outcome time window &gt; 36 months:</b>      |          |                                                |              |                                 |                                                                                                               |                                                                                       |
| UK                                              | Everyone | Pilling 2018 [40] <sup>11</sup><br>(4.5 years) | Hazard ratio | Yes, n = 914<br>No, n = 237,302 | <i>Modelled as continuous</i>                                                                                 | sHR = 0.98 (95% CI =<br>0.96, 1.00)                                                   |
|                                                 |          | Pilling 2018 [40] <sup>11</sup>                | Hazard ratio | Yes, n = 413                    | <i>Modelled as continuous</i>                                                                                 | sHR = 1.00 (95% CI =<br>0.97, 1.04)                                                   |

(4.5–9 years)

No, n = 237,451

**OUTCOME WINDOW NOT CATEGORISABLE: > 12-month risk of CRC diagnosis:**

|    |          |                                           |             |     |                             |  |
|----|----------|-------------------------------------------|-------------|-----|-----------------------------|--|
| UK | Everyone | Acher 2003 [1] <sup>4</sup><br>(> 1 year) | Descriptive | Yes | <78 fL, n>5000, events = 26 |  |
|    |          |                                           |             | No  | ≥78 fL, events = 274        |  |

**Unspecified outcome time window:**

|       |          |                                    |            |             |                              |                              |        |
|-------|----------|------------------------------------|------------|-------------|------------------------------|------------------------------|--------|
| Italy | Everyone | Panzuto 2003 [39] <sup>12,13</sup> | Odds ratio | Yes, n = 41 | <80 fL, n = 69, events = 28  | OR = 8.8 (95% CI = 3.9–19.8) | <0.001 |
|       |          |                                    |            | No, n = 170 | ≥80 fL, n = 211, events = 13 | Reference                    |        |

Abbreviations: CRC = colorectal cancer, OR = odds ratio, RR = risk ratio, SIR = standardised incidence ratios, sHR = sub-distribution hazard ratio. <sup>1</sup>Multivariable effect estimate, adjusted for: haemoglobin, neutrophil count, platelets, red blood cell distribution width, alanine aminotransferase, protein, iron, ferritin. <sup>2</sup>Multivariable effect estimate, adjusted for: haemoglobin, monocyte count, platelets, alkaline phosphatase, alanine aminotransferase, aspartate aminotransferase, iron, ferritin. <sup>3</sup>In the presence of serum ferritin<12 ng/ml and haemoglobin<11 g/dL for males and <10 g/dL for females. <sup>4</sup>In the presence of haemoglobin<10.1 g/dL and/or mean corpuscular haemoglobin concentration<32 g/dL. <sup>5</sup>Multivariable effect estimate, adjusted for: BMI, smoking status, history of hypertension, diabetes, aspirin or NSAIDS use, vitamin K antagonists, platelet inhibitors. <sup>6</sup>Multivariable effect estimate, adjusted for: sex, age, change in bowel habit, weight loss, bleeding per rectum, mucus per rectum, abdominal mass, abdominal fullness, lesion on digital rectal examination, anal lesion, abdominal distension, abdominal pain, family history, previous polyps, FOBt. <sup>7</sup>Multivariable effect estimate, adjusted for: haematocrit, lymphocyte count, neutrophil-lymphocyte ratio. <sup>8</sup>Multivariable effect estimate, adjusted for: haemoglobin, white blood cell count, neutrophil-lymphocyte ratio, platelets, sex, previous metformin prescriptions, previous prescriptions for oral hypoglycemic drugs other than metformin. <sup>9</sup>Multivariable effect estimate, adjusted for: constipation, diarrhoea, change in bowel habit, flatulence, irritable bowel syndrome, abdominal pain/antispasmodic, rectal bleeding, haemoglobin, weight loss, deep venous thrombosis/pulmonary embolism, diabetes, obesity. <sup>10</sup>Multivariable effect estimate, adjusted for: rectal bleeding, change in bowel habit, abdominal pain, diarrhoea, constipation, weight loss, haemoglobin. <sup>11</sup>Multivariable effect estimate, adjusted for: age, sex, smoking status, highest education level attained, haemoglobin, red blood cell distribution width. <sup>12</sup>In the presence of ferritin<30 and haemoglobin<14 g/dL for males and <12 g/dL for females. <sup>13</sup>Multivariable effect estimate, adjusted for: age, weight loss.

**Table S8:** Red blood cell distribution width for colorectal cancer, with analyses sorted by outcome time window, country, and strata

| Country                                       | Strata   | Article                          | Analysis type  | CRC outcome groups and no. per group | Blood level categories and no. per group | Analysis estimates                                                                                           | <i>p</i> -value |
|-----------------------------------------------|----------|----------------------------------|----------------|--------------------------------------|------------------------------------------|--------------------------------------------------------------------------------------------------------------|-----------------|
| <b>0 &lt; outcome time window ≤ 6 months:</b> |          |                                  |                |                                      |                                          |                                                                                                              |                 |
| China                                         | Everyone | Yang 2018 [51]<br>(At admission) | Mann-Whitney U | Yes, n = 85<br>Polyp, n = 54         |                                          | Median = 13.2%<br>Median = 12.6%                                                                             | 0.004           |
|                                               |          | Yang 2018 [51]<br>(At admission) | ROC            | Yes, n = 30<br>Polyp, n = 110        | 13.25% (derived using Youden's index)    | AUC = 0.72 (95% CI = 0.61, 0.83)<br>Sensitivity = 65.9%<br>Specificity = 75.6%<br>PPV = 81.2%<br>NPV = 58.6% |                 |
|                                               |          | Shi 2019 [44]<br>(2 weeks)       | T-test         | Yes, n = 211<br>Polyp, n = 103       |                                          | Median = 14.3% (SD = 2.7)<br>Median = 12.7% (SD = 1.1)                                                       | <0.001          |
|                                               |          | Shi 2019 [44]<br>(2 weeks)       | ROC            | Yes, n = 30<br>Polyp, n = 110        | 13.2% (derived using Youden's index)     | AUC = 0.72<br>Sensitivity = 53.1%<br>Specificity = 77.7%<br>PPV = 58.3%<br>NPV = 18.9%                       |                 |
|                                               |          | Song 2018 [45]<br>(At diagnosis) | Mann-Whitney U | Yes, n = 783<br>No, n = 331          |                                          | Median = 13.3%<br>Median = 12.9%                                                                             | <0.001          |
|                                               |          | Song 2018 [45]<br>(At diagnosis) | Mann-Whitney U | Yes, n = 783<br>Polyp, n = 463       |                                          | Median = 13.3%<br>Median = 13.0%                                                                             | <0.05           |
|                                               |          | Song 2018 [45]<br>(At diagnosis) | ROC            | Yes, n = 783<br>No, n = 331          | 13.95% (derived using Youden's index)    | AUC = 0.64 (95% CI = 0.61, 0.67)<br>Sensitivity = 41%<br>Specificity = 94%<br>PPV = 94%<br>NPV = 40%         |                 |

|        |          |                                                  |            |                               |                                               |                                                                                                         |         |
|--------|----------|--------------------------------------------------|------------|-------------------------------|-----------------------------------------------|---------------------------------------------------------------------------------------------------------|---------|
|        |          | Song 2018 [45]<br>(At diagnosis)                 | ROC        | Yes, n = 30<br>Polyp, n = 110 | 14.05% (derived using<br>Youden's index)      | AUC = 0.50 (95% CI =<br>0.47, 0.53)<br>Sensitivity = 29%<br>Specificity = 82%<br>PPV = 73%<br>NPV = 41% |         |
| Israel | Males    | Goshen 2017<br>[16]<br>(1–6 months)              | T-test     | Yes, n = 936<br>No, n = 28491 |                                               | Mean = 14.26%<br>Mean = 13.61%                                                                          | <0.0001 |
|        |          | Goshen 2017<br>[16]<br>(1–6 months)              | Risk ratio | Yes<br>No                     | Highest-risk quintile<br>Lowest-risk quintile | RR = 2.87 (95% CI =<br>2.23, 3.78)<br>Reference                                                         |         |
|        | Females  | Goshen 2017<br>[16]<br>(1–6 months)              | T-test     | Yes, n = 819<br>No, n = 26239 |                                               | Mean = 14.81%<br>Mean = 13.71%                                                                          | <0.0001 |
|        |          | Goshen 2017<br>[16]<br>(1–6 months)              | Risk ratio | Yes<br>No                     | Highest-risk quintile<br>Lowest-risk quintile | RR = 4.54 (95% CI =<br>3.58, 6.26)<br>Reference                                                         |         |
|        |          | Goshen 2017<br>[16] <sup>1</sup><br>(1–6 months) | Risk ratio | Yes, n = 819<br>No, n = 26239 | Highest-risk quintile<br>Lowest-risk quintile | RR = 3.14 (95% CI =<br>2.81, 3.66)<br>Reference                                                         | <0.0001 |
|        |          |                                                  |            |                               |                                               |                                                                                                         |         |
| Turkey | Everyone | Ay 2015 [3]<br>(1 week)                          | T-test     | Yes, n = 30<br>Polyp, n = 110 |                                               | Mean = 17.7% (SD =<br>2.7)<br>Mean = 15.5% (SD =<br>1.9)                                                | 0.02    |
|        |          | Ay 2015 [3]<br>(1 week)                          | ROC        | Yes, n = 30<br>Polyp, n = 110 | 17.5% (derived using<br>unknown methods)      | AUC = 0.747<br>Sensitivity = 53.3%<br>Specificity = 91.4%                                               |         |
|        |          | Cakmak 2017<br>[9]<br>(6 months)                 | T-test     | Yes, n = 59<br>No, n = 59     |                                               | Mean = 16.1% (SD =<br>3.4)<br>Mean = 13.6% (SD =<br>0.6)                                                | <0.001  |

|                                            |          |                                                 |              |                             |                                                                                   |                                                                                                                                                                                                                                   |        |
|--------------------------------------------|----------|-------------------------------------------------|--------------|-----------------------------|-----------------------------------------------------------------------------------|-----------------------------------------------------------------------------------------------------------------------------------------------------------------------------------------------------------------------------------|--------|
|                                            |          | Cakmak 2017 [9]<br>(6 months)                   | ROC          | Yes, n = 59<br>No, n = 59   | 14% (derived using unknown methods)                                               | AUC = 0.774<br>Sensitivity = 68%<br>Specificity = 73%                                                                                                                                                                             |        |
| USA                                        | Everyone | Spell 2004 [46]<br>(6 months)                   | Chi-squared  | Yes, n = 255<br>No, n = 487 | ≥14.2%, n = 213, events = 156<br><14.2%, n = 499, events = 69                     |                                                                                                                                                                                                                                   | <0.001 |
|                                            |          | Spell 2004 [46]<br>(6 months)                   | Odds ratio   | Yes, n = 156<br>No, n = 556 | ≥14.2%, n = 213, events = 156<br><14.2%, n = 499, events = 69                     | OR = 17.1 (95% CI = 11.5, 25.3)<br>Reference                                                                                                                                                                                      |        |
| <b>Outcome time window &gt; 36 months:</b> |          |                                                 |              |                             |                                                                                   |                                                                                                                                                                                                                                   |        |
| UK                                         | Everyone | Pilling 2018 [40] <sup>2</sup><br>(4.5 years)   | Hazard ratio | Yes<br>No                   | <12%<br>≥12.5–12.9%<br>≥13–13.4%<br>≥13.5–13.9%<br>≥14–14.4%<br>≥14–14.9%<br>≥15% | Reference<br>sHR = 1.25 (95% CI = 0.90, 1.72)<br>sHR = 1.28 (95% CI = 0.94, 1.75)<br>sHR = 1.55 (95% CI = 1.33, 2.12)<br>sHR = 1.39 (95% CI = 0.99, 1.97)<br>sHR = 1.88 (95% CI = 1.26, 2.80)<br>sHR = 2.24 (95% CI = 1.47, 3.40) |        |
|                                            |          | Pilling 2018 [40] <sup>2</sup><br>(4.5–9 years) | Hazard ratio | Yes<br>No                   | <12%<br>≥12.5–12.9%<br>≥13–13.4%<br>≥13.5–13.9%                                   | Reference<br>sHR = 1.04 (95% CI = 0.68, 1.59)<br>sHR = 1.23 (95% CI = 0.82, 1.84)<br>sHR = 0.91 (95% CI = 0.59, 1.40)                                                                                                             |        |



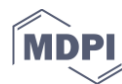

|           |                                  |
|-----------|----------------------------------|
| ≥14–14.4% | sHR = 1.13 (95% CI = 0.70, 1.81) |
| ≥14–14.9% | sHR = 1.25 (95% CI = 0.69, 2.24) |
| ≥15%      | sHR = 1.46 (95% CI = 0.76, 2.79) |

---

Abbreviations: CRC = colorectal cancer, OR = odds ratio, RR = risk ratio, sHR = sub-distribution hazard ratio (from Fine-Gray model), ROC = receiver operating characteristic, AUC = area under the curve, PPV = positive predictive value, NPV = negative predictive value. <sup>1</sup>Multivariable effect estimate, adjusted for: haemoglobin, monocyte count, platelets, alkaline phosphatase, alanine aminotransferase, aspartate aminotransferase, iron, ferritin. <sup>2</sup>Multivariable effect estimate, adjusted for: age, sex, smoking status, highest education level attained, haemoglobin, red blood cell distribution width.

**Table S9:** Platelet levels for colorectal cancer, with analyses sorted by outcome time window, country, and strata

| Country                                       | Strata                     | Article           | Analysis type                                | CRC outcome groups and no. per group                    | Blood level categories and no. per group     | Analysis estimates                           | <i>p</i> -value |
|-----------------------------------------------|----------------------------|-------------------|----------------------------------------------|---------------------------------------------------------|----------------------------------------------|----------------------------------------------|-----------------|
| <b>0 &lt; outcome time window ≤ 6 months:</b> |                            |                   |                                              |                                                         |                                              |                                              |                 |
| China                                         | Everyone                   | Wu 2019 [50]      | T-test                                       | Yes, n = 186                                            |                                              | Mean = 279.8 10 <sup>9</sup> /L (SD = 80.56) | <0.05           |
|                                               |                            | (At diagnosis)    |                                              | No, n = 108                                             |                                              | Mean = 207.83 10 <sup>9</sup> /L (SD = 37.4) |                 |
|                                               |                            | Wu 2019 [50]      | T-test                                       | Yes, n = 186                                            |                                              | Mean = 279.8 10 <sup>9</sup> /L (SD = 80.56) | <0.05           |
|                                               |                            | (At diagnosis)    |                                              | Polyp, n = 132                                          |                                              | Mean = 223.9 10 <sup>9</sup> /L (SD = 42.59) |                 |
|                                               |                            | Wu 2019 [50]      |                                              | ANOVA                                                   |                                              | Yes = 186                                    |                 |
|                                               | (At diagnosis)             | Polyp = 132       | Mean = 223.9 10 <sup>9</sup> /L (SD = 42.59) |                                                         |                                              |                                              |                 |
|                                               |                            | Healthy = 108     | Mean = 207.83 10 <sup>9</sup> /L (SD = 37.4) |                                                         |                                              |                                              |                 |
|                                               |                            | Yang 2018 [51]    | Mann-Whitney U                               | Yes, n = 85                                             |                                              | Median = 219 10 <sup>9</sup> /L              | 0.021           |
|                                               | (At admission)             | Polyp, n = 54     |                                              | Median = 201 10 <sup>9</sup> /L                         |                                              |                                              |                 |
|                                               | Zhu 2018 [53] <sup>1</sup> | T-test            | Yes, n = 783                                 |                                                         | Mean = 272.4 10 <sup>9</sup> /L (SD = 86.86) | <0.01                                        |                 |
| (At diagnosis)                                | No, n = 689                |                   | Mean = 220 10 <sup>9</sup> /L                |                                                         |                                              |                                              |                 |
|                                               | Zhu 2018 [53] <sup>1</sup> | T-test            | Yes, n = 783                                 |                                                         | Mean = 272.4 10 <sup>9</sup> /L (SD = 86.86) | <0.01                                        |                 |
| (At diagnosis)                                | Polyp, n = 463             |                   | Mean = 216.67 10 <sup>9</sup> /L             |                                                         |                                              |                                              |                 |
|                                               | Zhu 2018 [53]              | ROC               | Yes, n = 783                                 | 242.5 10 <sup>9</sup> /L (derived using Youden's index) | AUC = 0.71 (95% CI = 0.68, 0.74)             |                                              |                 |
| (At diagnosis)                                | Polyp, n = 689             | Sensitivity = 62% |                                              |                                                         |                                              |                                              |                 |
|                                               |                            | Specificity = 72% |                                              |                                                         |                                              |                                              |                 |
|                                               |                            | PPV = 78.9%       |                                              |                                                         |                                              |                                              |                 |
|                                               |                            |                   |                                              |                                                         | NPV = 52.8%                                  |                                              |                 |

|                                       |         |                                               |                               |                               |                                                                                           |                                                                |                                                                                          |        |
|---------------------------------------|---------|-----------------------------------------------|-------------------------------|-------------------------------|-------------------------------------------------------------------------------------------|----------------------------------------------------------------|------------------------------------------------------------------------------------------|--------|
| Israel                                | Males   | Goshen 2017 [16]<br>(1–6 months)              | T-test                        | Yes, n = 936<br>No, n = 28491 |                                                                                           | Mean = 261 10 <sup>9</sup> /L<br>Mean = 222 10 <sup>9</sup> /L | <0.0001                                                                                  |        |
|                                       |         | Goshen 2017 [16]<br>(1–6 months)              | Risk ratio                    | Yes<br>No                     | Highest-risk quintile<br>Lowest-risk quintile                                             | RR = 3.78 (95% CI = 2.95, 4.88)<br>Reference                   |                                                                                          |        |
|                                       |         | Goshen 2017 [16] <sup>2</sup><br>(1–6 months) | Risk ratio                    | Yes, n = 936<br>No, n = 28491 | Highest-risk quintile<br>Lowest-risk quintile                                             | RR = 2.84 (95% CI = 2.5, 3.27)<br>Reference                    |                                                                                          |        |
|                                       | Females | Goshen 2017 [16]<br>(1–6 months)              | T-test                        | Yes, n = 819<br>No, n = 26239 |                                                                                           | Mean = 305 10 <sup>9</sup> /L<br>Mean = 254 10 <sup>9</sup> /L | <0.0001                                                                                  |        |
|                                       |         | Goshen 2017 [16]<br>(1–6 months)              | Risk ratio                    | Yes<br>No                     | Highest-risk quintile<br>Lowest-risk quintile                                             | RR = 3.87 (95% CI = 3.09, 5.21)<br>Reference                   |                                                                                          |        |
|                                       |         | Goshen 2017 [16] <sup>3</sup><br>(1–6 months) | Risk ratio                    | Yes, n = 819<br>No, n = 26239 | Highest-risk quintile<br>Lowest-risk quintile                                             | RR = 2.95 (95% CI = 2.56, 3.35)<br>Reference                   |                                                                                          |        |
|                                       | Turkey  | Everyone                                      | Ay 2015 [3]<br>(1 week)       | T-test                        | Yes, n = 30<br>Polyp, n = 110                                                             |                                                                | Mean = 287.7 /μL (SD = 78.4)<br>Mean = 278.9 /μL (SD = 59.6)                             | ≥0.05  |
|                                       |         |                                               | Cakmak 2017 [9]<br>(6 months) | T-test                        | Yes, n = 59<br>No, n = 59                                                                 |                                                                | Mean = 308.9 10 <sup>9</sup> /L (SD = 99.1)<br>Mean = 243 10 <sup>9</sup> /L (SD = 46.2) | <0.001 |
|                                       |         | Firat 2016 [14]<br>(At diagnosis)             | Chi-squared                   | Yes<br>No                     |                                                                                           |                                                                | 0.001                                                                                    |        |
| Kilincalp 2015 [28]<br>(At diagnosis) |         | T-test                                        | Yes, n = 144<br>No, n = 143   |                               | Mean = 280.8 10 <sup>9</sup> /L (SD = 106)<br>Mean = 239.7 10 <sup>9</sup> /L (SD = 50.7) | <0.001                                                         |                                                                                          |        |

6 < outcome time window ≤ 12 months:

|                                                 |            |                              |                                |               |                                                          |                                  |        |
|-------------------------------------------------|------------|------------------------------|--------------------------------|---------------|----------------------------------------------------------|----------------------------------|--------|
| UK                                              | Everyone   | Boursi 2016 [8]              | Odds ratio                     | Yes, n = 4929 | <i>Modelled as continuous</i>                            | OR = 1.01 (95% CI = 1.005, 1.01) | <0.001 |
|                                                 |            | (1 year)                     |                                | No, n = 11491 |                                                          |                                  |        |
|                                                 |            | Boursi 2016 [8] <sup>4</sup> | Odds ratio                     | Yes, n = 3375 | <i>Modelled as fractional polynomials (powers: 2, 3)</i> | OR = 605076.39*Plat <sup>2</sup> |        |
| (1 year)                                        |            | No, n = 8560                 | OR = 0.00001*Plat <sup>3</sup> |               |                                                          |                                  |        |
| Ankus 2018 [2]                                  | Odds ratio | (1 year)                     |                                | Yes, n = 22   | 325–349 10 <sup>9</sup> /L, n = 1439, events = 7         | Reference                        |        |
|                                                 |            |                              |                                | No, n = 2697  | 350–374 10 <sup>9</sup> /L, n = 779, events = 8          | OR = 2.39 (95% CI = 0.89, 6.45)  |        |
|                                                 |            |                              |                                |               | 375–399, n = 486, events = 7                             | OR = 2.99 (95% CI = 1.04, 8.57)  |        |
| <b>12 &lt; outcome time window ≤ 36 months:</b> |            |                              |                                |               |                                                          |                                  |        |
| UK                                              | Everyone   | Bailey 2017 [6]              | Descriptive                    | Yes           | ≤400 10 <sup>9</sup> /L, n = 7969, events = 627          |                                  |        |
|                                                 |            |                              |                                | No            | >400 10 <sup>9</sup> /L, n = 31261                       |                                  |        |

Abbreviations: CRC = colorectal cancer, OR = odds ratio, RR = risk ratio, ROC = receiver operating characteristic, AUC = area under the curve, PPV = positive predictive value, NPV = negative predictive value. <sup>1</sup>Mean measured from graphs. <sup>2</sup>Multivariable effect estimate, adjusted for: haemoglobin, mean corpuscular volume, neutrophil count, red blood cell distribution width, alanine aminotransferase, protein, iron, ferritin. <sup>3</sup>Multivariable effect estimate, adjusted for: haemoglobin, mean corpuscular volume, monocyte count, alkaline phosphatase, alanine aminotransferase, aspartate aminotransferase, iron, ferritin. <sup>4</sup>Multivariable effect estimate, adjusted for: haemoglobin, mean corpuscular volume, white blood cell count, neutrophil-lymphocyte ratio, sex, previous metformin prescriptions, previous prescriptions for oral hypoglycemic drugs other than metformin.

**Table S10:** Mean platelet volume for colorectal cancer, with analyses sorted by outcome time window, country, and strata

| Country                                       | Strata   | Article                    | Analysis type              | CRC outcome groups and no. per group | Blood level categories and no. per group           | Analysis estimates                                                 | p-value                                                                  |       |
|-----------------------------------------------|----------|----------------------------|----------------------------|--------------------------------------|----------------------------------------------------|--------------------------------------------------------------------|--------------------------------------------------------------------------|-------|
| <b>0 &lt; outcome time window ≤ 6 months:</b> |          |                            |                            |                                      |                                                    |                                                                    |                                                                          |       |
| China                                         | Everyone | Wu 2019 [50]               | T-test                     | Yes, n = 186                         |                                                    | Mean = 8.48 fL (SD = 1.10)                                         | <0.001                                                                   |       |
|                                               |          | (At diagnosis)             |                            | No, n = 108                          |                                                    | Mean = 8.98 fL (SD = 0.77)                                         |                                                                          |       |
|                                               |          | Wu 2019 [50]               | T-test                     | Yes, n = 186                         |                                                    | Mean = 8.48 fL (SD = 1.10)                                         | <0.05                                                                    |       |
|                                               |          | (At diagnosis)             |                            | Polyp, n = 132                       |                                                    | Mean = 8.83 fL (SD = 0.90)                                         |                                                                          |       |
|                                               |          |                            | Wu 2019 [50]               | ROC                                  | Yes, n = 186                                       |                                                                    | AUC = 0.66 (95% CI = 0.60, 0.71)                                         |       |
|                                               |          |                            | (At diagnosis)             |                                      | Healthy, n = 108                                   |                                                                    | Sensitivity = 92.6%<br>Specificity = 44.6%<br>PPV = 49.3%<br>NPV = 91.2% |       |
|                                               |          |                            | Zhu 2018 [53] <sup>1</sup> | T-test                               | Yes, n = 783                                       |                                                                    | Mean = 10 fL (SD = 5.82)                                                 | <0.01 |
|                                               |          |                            | (At diagnosis)             |                                      | No, n = 689                                        |                                                                    | Mean = 9.13 fL                                                           |       |
|                                               |          | Zhu 2018 [53] <sup>1</sup> | T-test                     | Yes, n = 783                         |                                                    | Mean = 10 fL (SD = 5.82)                                           | <0.01                                                                    |       |
|                                               |          | (At diagnosis)             |                            | Polyp, n = 463                       |                                                    | Mean = 9.2 fL                                                      |                                                                          |       |
|                                               |          | Zhu 2018 [53]              | ROC                        | Yes, n = 783                         | <9.25 fL optimal (calculated using Youden's index) | AUC = 0.66 (95% CI = 0.66, 0.69)                                   |                                                                          |       |
|                                               |          | (At diagnosis)             |                            | Polyp, n = 463                       |                                                    | Sensitivity = 69%<br>Specificity = 59%<br>PPV = 74%<br>NPV = 52.9% |                                                                          |       |
| Israel                                        | Males    | Goshen 2017 [16]           | T-test                     | Yes, n = 936                         |                                                    | Mean = 10.08 fL                                                    | <0.0001                                                                  |       |

|         |          |                     |            |               |                                                    |                                 |         |
|---------|----------|---------------------|------------|---------------|----------------------------------------------------|---------------------------------|---------|
|         |          | (1–6 months)        |            | No, n = 28491 |                                                    | Mean = 11.07 fL                 |         |
|         |          | Goshen 2017 [16]    | Risk ratio | Yes           | Highest-risk quintile                              | RR = 2.33 (95% CI = 1.8, 2.93)  |         |
|         |          | (1–6 months)        |            | No            | Lowest-risk quintile                               | Reference                       |         |
| Females |          | Goshen 2017 [16]    | T-test     | Yes, n = 819  |                                                    | Mean = 10.78 fL                 | <0.0001 |
|         |          | (1–6 months)        |            | No, n = 26239 |                                                    | Mean = 11.06 fL                 |         |
|         |          | Goshen 2017 [16]    | Risk ratio | Yes           | Highest-risk quintile                              | RR = 2.33 (95% CI = 1.72, 3.26) |         |
|         |          | (1–6 months)        |            | No            | Lowest-risk quintile                               | Reference                       |         |
| Turkey  | Everyone | Kilincalp 2015 [28] | T-test     | Yes, n = 144  |                                                    | Mean = 8.41 fL (SD = 0.98)      | <0.001  |
|         |          | (At diagnosis)      |            | No, n = 143   |                                                    | Mean = 7.87 fL (SD = 0.49)      |         |
|         |          | Kilincalp 2015 [28] | ROC        | Yes, n = 144  | <8.25 fL optimal (calculated using unknown method) | AUC = 0.717                     |         |
|         |          | (At diagnosis)      |            | No, n = 143   |                                                    | Sensitivity = 54%               |         |
|         |          |                     |            |               |                                                    | Specificity = 76%               |         |

Abbreviations: CRC = colorectal cancer, RR = risk ratio, ROC = receiver operating characteristic, AUC = area under the curve, PPV = positive predictive value, NPV = negative predictive value. <sup>1</sup>Mean measured from graphs.

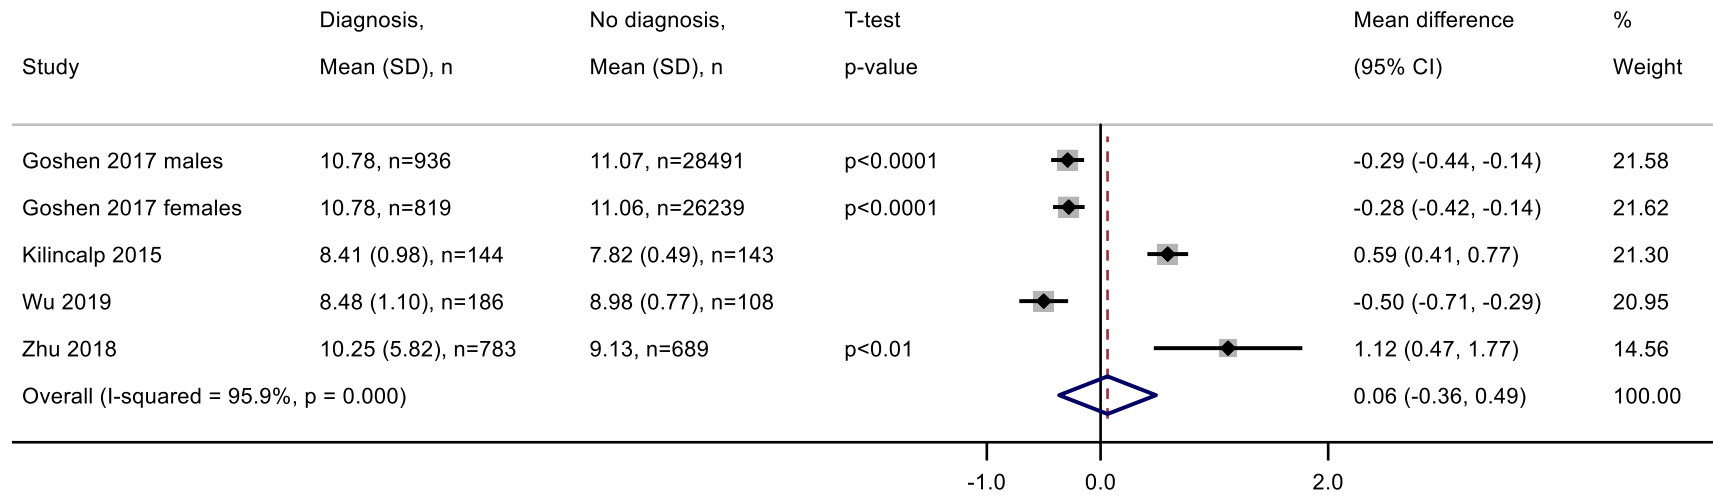

**Figure S1:** Forest plot of mean difference in mean platelet volume between those with and without a diagnosis of colorectal cancer 0-6 months later. Abbreviations: SD = standard deviation, CI = confidence interval. Mean platelet volume measurements are in fL.

**Table S11:** Basophil count for colorectal cancer, with analyses sorted by outcome time window, country, and strata

| Country                                        | Strata                        | Article                       | Analysis type | CRC outcome groups and no. per group | Blood level categories and no. per group | Analysis estimates              | <i>p</i> -value |
|------------------------------------------------|-------------------------------|-------------------------------|---------------|--------------------------------------|------------------------------------------|---------------------------------|-----------------|
| <b>0 &lt; outcome time window ≤ 6 months:</b>  |                               |                               |               |                                      |                                          |                                 |                 |
| Israel                                         | Males                         | Goshen 2017 [16] (1–6 months) | T-test        | Yes, n = 936                         |                                          | Mean = 0.03 10 <sup>9</sup> /L  | 0.0017          |
|                                                |                               |                               |               | No, n = 28491                        |                                          | Mean = 0.03 10 <sup>9</sup> /L  |                 |
|                                                | Goshen 2017 [16] (1–6 months) | Risk ratio                    | Yes           | Highest-risk quintile                | RR = 1.4 (95% CI = 1.14, 1.75)           |                                 |                 |
|                                                |                               |                               | No            | Lowest-risk quintile                 |                                          | Reference                       |                 |
| Females                                        | Goshen 2017 [16] (1–6 months) | T-test                        | Yes, n = 819  |                                      | Mean = 0.03 10 <sup>9</sup> /L           | 0.0003                          |                 |
|                                                |                               |                               | No, n = 26239 |                                      | Mean = 0.03 10 <sup>9</sup> /L           |                                 |                 |
|                                                | Goshen 2017 [16] (1–6 months) | Risk ratio                    | Yes           | Highest-risk quintile                | RR = 1.19 (95% CI = 1.02, 1.48)          |                                 |                 |
|                                                |                               |                               | No            | Lowest-risk quintile                 |                                          | Reference                       |                 |
| <b>6 &lt; outcome time window ≤ 12 months:</b> |                               |                               |               |                                      |                                          |                                 |                 |
| UK                                             | Everyone                      | Boursi 2016 [8] (1 year)      | Odds ratio    | Yes, n = 4929<br>No, n = 11311       | <i>Modelled as continuous</i>            | OR = 1.34 (95% CI = 0.93, 1.95) | 0.12            |

Abbreviations: CRC = colorectal cancer, OR = odds ratio, RR = risk ratio



**Table S12:** Eosinophil count for colorectal cancer, with analyses sorted by outcome time window, country, and strata

| Country                                        | Strata   | Article                       | Analysis type        | CRC outcome groups and no. per group | Blood level categories and no. per group | Analysis estimates              | <i>p</i> -value |
|------------------------------------------------|----------|-------------------------------|----------------------|--------------------------------------|------------------------------------------|---------------------------------|-----------------|
| <b>0 &lt; outcome time window ≤ 6 months:</b>  |          |                               |                      |                                      |                                          |                                 |                 |
| Israel                                         | Males    | Goshen 2017 [16] (1–6 months) | T-test               | Yes, n = 936                         |                                          | Mean = 0.25 10 <sup>9</sup> /L  | <0.0001         |
|                                                |          |                               |                      | No, n = 28491                        |                                          | Mean = 0.22 10 <sup>9</sup> /L  |                 |
|                                                |          | Goshen 2017 [16] (1–6 months) | Risk ratio           | Yes                                  | Highest-risk quintile                    | RR = 1.62 (95% CI = 1.29, 2.04) |                 |
|                                                | No       |                               |                      | Lowest-risk quintile                 | Reference                                |                                 |                 |
|                                                | Females  | Goshen 2017 [16] (1–6 months) | T-test               | Yes, n = 819                         |                                          | Mean = 0.21 10 <sup>9</sup> /L  | <0.0001         |
|                                                |          |                               |                      | No, n = 26239                        |                                          | Mean = 0.18 10 <sup>9</sup> /L  |                 |
| Goshen 2017 [16] (1–6 months)                  |          | Risk ratio                    | Yes                  | Highest-risk quintile                | RR = 2.03 (95% CI = 1.58, 2.79)          |                                 |                 |
|                                                | No       |                               | Lowest-risk quintile | Reference                            |                                          |                                 |                 |
| <b>6 &lt; outcome time window ≤ 12 months:</b> |          |                               |                      |                                      |                                          |                                 |                 |
| UK                                             | Everyone | Boursi 2016 [8] (1 year)      | Odds ratio           | Yes, n = 4929<br>No, n = 11311       | <i>Modelled as continuous</i>            | OR = 1.09 (95% CI = 0.98, 1.2)  | 0.1             |

Abbreviations: CRC = colorectal cancer, OR = odds ratio, RR = risk ratio

**Table S23:** Lymphocyte count for colorectal cancer, with analyses sorted by outcome time window, country, and strata

| Country                                       | Strata                        | Article                        | Analysis type                             | CRC outcome groups and no. per group | Blood level categories and no. per group                                                                                               | Analysis estimates                         | <i>p</i> -value |
|-----------------------------------------------|-------------------------------|--------------------------------|-------------------------------------------|--------------------------------------|----------------------------------------------------------------------------------------------------------------------------------------|--------------------------------------------|-----------------|
| <b>0 &lt; outcome time window ≤ 6 months:</b> |                               |                                |                                           |                                      |                                                                                                                                        |                                            |                 |
| China                                         | Everyone                      | Huang 2019 [25] (At admission) | T-test                                    | Yes, n = 162                         |                                                                                                                                        | Mean = 1.97 10 <sup>9</sup> /L (SD = 0.57) | ≥0.05           |
|                                               |                               |                                |                                           | No, n = 78                           |                                                                                                                                        | Mean = 2.03 10 <sup>9</sup> /L (SD = 0.57) |                 |
|                                               |                               | Huang 2019 [25] (At admission) | T-test                                    | Yes, n = 162                         |                                                                                                                                        | Mean = 1.97 10 <sup>9</sup> /L (SD = 0.57) | ≥0.05           |
|                                               |                               |                                |                                           | Polyp, n = 92                        |                                                                                                                                        | Mean = 1.98 10 <sup>9</sup> /L (SD = 0.61) |                 |
|                                               |                               | Wu 2019 [50] (At diagnosis)    | T-test                                    | Yes, n = 186                         |                                                                                                                                        | Mean = 1.99 10 <sup>9</sup> /L (SD = 0.58) | <0.05           |
|                                               |                               |                                |                                           | No, n = 108                          |                                                                                                                                        | Mean = 2.18 10 <sup>9</sup> /L (SD = 0.51) |                 |
|                                               |                               | Wu 2019 [50] (At diagnosis)    | T-test                                    | Yes, n = 186                         |                                                                                                                                        | Mean = 1.99 10 <sup>9</sup> /L (SD = 0.58) | ≥0.05           |
| Polyp, n = 132                                |                               |                                |                                           |                                      | Mean = 1.99 10 <sup>9</sup> /L (SD = 0.60)                                                                                             |                                            |                 |
|                                               | Wu 2019 [50] (At diagnosis)   | ANOVA                          | Yes = 186<br>Polyp = 132<br>Healthy = 108 |                                      | Mean = 1.99 10 <sup>9</sup> /L (SD = 0.58)<br>Mean = 1.99 10 <sup>9</sup> /L (SD = 0.60)<br>Mean = 2.18 10 <sup>9</sup> /L (SD = 0.51) | 0.01                                       |                 |
|                                               | Yang 2018 [51] (At admission) | Mann-Whitney U                 | Yes, n = 85<br>Polyp, n = 54              |                                      | Median = 1.6 10 <sup>9</sup> /L<br>Median = 1.7 10 <sup>9</sup> /L                                                                     | 0.526                                      |                 |
| Israel                                        | Males                         | Goshen 2017 [16] (1–6 months)  | T-test                                    | Yes, n = 936                         |                                                                                                                                        | Mean = 2.13 10 <sup>9</sup> /L             | 0.026           |
|                                               |                               |                                |                                           | No, n = 28491                        |                                                                                                                                        | Mean = 2.21 10 <sup>9</sup> /L             |                 |

|                                                |          |                                          |            |               |                                                           |                                 |      |
|------------------------------------------------|----------|------------------------------------------|------------|---------------|-----------------------------------------------------------|---------------------------------|------|
|                                                |          | Goshen 2017 [16]<br>(1–6 months)         | Risk ratio | Yes           | Highest-risk quintile                                     | RR = 1.17 (95% CI = 1.01, 1.53) |      |
|                                                |          |                                          |            | No            | Lowest-risk quintile                                      | Reference                       |      |
| Females                                        |          | Goshen 2017 [16]<br>(1–6 months)         | T-test     | Yes, n = 819  |                                                           | Mean = 2.25 10 <sup>9</sup> /L  | 0.43 |
|                                                |          |                                          |            | No, n = 26239 |                                                           | Mean = 2.21 10 <sup>9</sup> /L  |      |
|                                                |          | Goshen 2017 [16]<br>(1–6 months)         | Risk ratio | Yes           | Highest-risk quintile                                     | RR = 1.37 (95% CI = 1.06, 1.78) |      |
|                                                |          |                                          |            | No            | Lowest-risk quintile                                      | Reference                       |      |
| <b>6 &lt; outcome time window ≤ 12 months:</b> |          |                                          |            |               |                                                           |                                 |      |
| UK                                             | Everyone | Boursi 2016 [8] <sub>1</sub><br>(1 year) | Odds ratio | Yes, n = 4929 | <i>Modelled as fractional polynomial (powers: 0, 0.5)</i> | OR = 1.16*Lym <sup>0</sup>      |      |
|                                                |          |                                          |            | No, n = 11311 |                                                           | OR = 12.23*Lym <sup>0.5</sup>   |      |

Abbreviations: CRC = colorectal cancer, OR = odds ratio, RR = risk ratio. <sup>1</sup>Multivariable effect estimate, adjusted for: haematocrit, mean corpuscular volume, neutrophil-lymphocyte ratio.

**Table S34: Lymphocyte proportion for colorectal cancer**

| Country                                       | Strata          | Article                       | Analysis type  | CRC outcome groups and no. per group | Median per outcome group | <i>p</i> -value |
|-----------------------------------------------|-----------------|-------------------------------|----------------|--------------------------------------|--------------------------|-----------------|
| <b>0 &lt; outcome time window ≤ 6 months:</b> |                 |                               |                |                                      |                          |                 |
| China                                         | Everyone        | Zhou 2017 [52] (At diagnosis) | Mann-Whitney U | Yes, n = 242                         | Median = 23.95%          | <0.001          |
|                                               |                 |                               |                | No, n = 262                          | Median = 35.15%          |                 |
|                                               |                 | Zhou 2017 [52] (At diagnosis) | Mann-Whitney U | Yes, n = 242                         | Median = 23.95%          | <0.001          |
|                                               |                 |                               |                | Polyp, n = 248                       | Median = 31.50%          |                 |
|                                               |                 | Zhou 2017 [52] (At diagnosis) | Kruskal-Wallis | Yes, n = 242                         | Median = 23.95%          | <0.001          |
|                                               |                 |                               |                | Polyp, n = 248                       | Median = 31.50%          |                 |
| No, n = 262                                   | Median = 35.15% |                               |                |                                      |                          |                 |

Abbreviations: CRC = colorectal cancer

**Table S45:** Monocyte count for colorectal cancer, with analyses sorted by outcome time window, country, and strata

| Country                                       | Strata                        | Article                                   | Analysis type | CRC outcome groups and no. per group                                                               | Blood level categories and no. per group | Analysis estimates                         | p-value |
|-----------------------------------------------|-------------------------------|-------------------------------------------|---------------|----------------------------------------------------------------------------------------------------|------------------------------------------|--------------------------------------------|---------|
| <b>0 &lt; outcome time window ≤ 6 months:</b> |                               |                                           |               |                                                                                                    |                                          |                                            |         |
| China                                         | Everyone                      | Wu 2019 [50]                              | T-test        | Yes, n = 186                                                                                       |                                          | Mean = 0.53 10 <sup>9</sup> /L (SD = 0.19) | <0.05   |
|                                               |                               | (At diagnosis)                            |               | No, n = 108                                                                                        |                                          | Mean = 0.45 10 <sup>9</sup> /L (SD = 0.15) |         |
|                                               |                               | Wu 2019 [50]                              | T-test        | Yes, n = 186                                                                                       |                                          | Mean = 0.53 10 <sup>9</sup> /L (SD = 0.19) | ≥0.05   |
|                                               |                               | (At diagnosis)                            |               | Polyp, n = 132                                                                                     |                                          | Mean = 0.50 10 <sup>9</sup> /L (SD = 0.17) |         |
| Wu 2019 [50]                                  | ANOVA                         | Yes = 186<br>Polyp = 132<br>Healthy = 108 |               | Mean = 0.53 10 <sup>9</sup> /L<br>Mean = 0.50 10 <sup>9</sup> /L<br>Mean = 0.45 10 <sup>9</sup> /L | 0.001                                    |                                            |         |
| Israel                                        | Males                         | Goshen 2017 [16]                          | T-test        | Yes, n = 936                                                                                       |                                          | Mean = 0.68 10 <sup>9</sup> /L             | <0.0001 |
|                                               |                               | (1–6 months)                              |               | No, n = 28491                                                                                      |                                          | Mean = 0.61 10 <sup>9</sup> /L             |         |
|                                               |                               | Goshen 2017 [16]                          | Risk ratio    | Yes                                                                                                | Highest-risk quintile                    | RR = 2.11 (95% CI = 1.74, 2.8)             |         |
|                                               | (1–6 months)                  | No                                        |               | Lowest-risk quintile                                                                               | Reference                                |                                            |         |
|                                               | Goshen 2017 [16] <sup>1</sup> | Risk ratio                                | Yes, n = 936  | Highest-risk quintile                                                                              | RR = 1.85 (95% CI = 1.6, 2.12)           |                                            |         |
|                                               | (1–6 months)                  |                                           | No, n = 28491 | Lowest-risk quintile                                                                               | Reference                                |                                            |         |
| Females                                       |                               | Goshen 2017 [16]                          | T-test        | Yes, n = 819                                                                                       |                                          | Mean = 0.56 10 <sup>9</sup> /L             | <0.0001 |
|                                               |                               | (1–6 months)                              |               | No, n = 26239                                                                                      |                                          | Mean = 0.51 10 <sup>9</sup> /L             |         |
|                                               |                               | Goshen 2017 [16]                          | Risk ratio    | Yes                                                                                                | Highest-risk quintile                    | RR = 1.99 (95% CI = 1.63, 2.65)            |         |
| (1–6 months)                                  | No                            | Lowest-risk quintile                      |               | Reference                                                                                          |                                          |                                            |         |

**6 < outcome time window ≤ 12 months:**

---

|    |          |                 |            |               |                               |                                 |
|----|----------|-----------------|------------|---------------|-------------------------------|---------------------------------|
| UK | Everyone | Boursi 2016 [8] | Odds ratio | Yes, n = 4929 | <i>Modelled as continuous</i> | OR = 1.08 (95% CI = 1.03, 1.14) |
|    |          | (1 year)        |            | No, n = 11311 |                               |                                 |

---

Abbreviations: CRC = colorectal cancer, OR = odds ratio, RR = risk ratio. <sup>1</sup>Multivariable effect estimate, adjusted for: haemoglobin, mean corpuscular volume, platelets, alkaline phosphatase, alanine aminotransferase, aspartate aminotransferase, iron, ferritin

**Table S56:** Neutrophil count for colorectal cancer, with analyses sorted by outcome time window, country, and strata

| Country                                       | Strata         | Article                       | Analysis type                                 | CRC outcome groups and no. per group                               | Blood level categories and no. per group      | Analysis estimates                                                                                 | <i>p</i> -value |                                |
|-----------------------------------------------|----------------|-------------------------------|-----------------------------------------------|--------------------------------------------------------------------|-----------------------------------------------|----------------------------------------------------------------------------------------------------|-----------------|--------------------------------|
| <b>0 &lt; outcome time window ≤ 6 months:</b> |                |                               |                                               |                                                                    |                                               |                                                                                                    |                 |                                |
| China                                         | Everyone       | Wu 2019 [50]                  | T-test                                        | Yes, n = 186                                                       |                                               | Mean = 3.92 10 <sup>9</sup> /L (SD = 1.26)                                                         | <0.05           |                                |
|                                               |                | (At diagnosis)                |                                               | No, n = 108                                                        |                                               | Mean = 3.40 10 <sup>9</sup> /L (SD = 0.79)                                                         |                 |                                |
|                                               | (At diagnosis) | Wu 2019 [50]                  | T-test                                        | Yes, n = 186                                                       |                                               | Mean = 3.92 10 <sup>9</sup> /L (SD = 1.26)                                                         | <0.05           |                                |
|                                               |                |                               |                                               | Polyp, n = 132                                                     |                                               | Mean = 3.57 10 <sup>9</sup> /L (SD = 1.26)                                                         |                 |                                |
|                                               |                | Wu 2019 [50]                  | ANOVA                                         | Yes = 186<br>Polyp = 132<br>Healthy = 108                          |                                               | Mean = 3.92 10 <sup>9</sup> /L<br>Mean = 3.57 10 <sup>9</sup> /L<br>Mean = 3.40 10 <sup>9</sup> /L |                 | <0.001                         |
| Yang 2018 [51]                                | Mann-Whitney U | Yes, n = 85<br>Polyp, n = 54  |                                               | Median = 3.6 10 <sup>9</sup> /L<br>Median = 3.2 10 <sup>9</sup> /L | 0.136                                         |                                                                                                    |                 |                                |
| Israel                                        | Males          | Goshen 2017 [16]              | T-test                                        | Yes, n = 936                                                       |                                               | Mean = 4.69 10 <sup>9</sup> /L                                                                     | <0.0001         |                                |
|                                               |                | (1–6 months)                  |                                               | No, n = 28491                                                      |                                               | Mean = 4.13 10 <sup>9</sup> /L                                                                     |                 |                                |
|                                               |                | Goshen 2017 [16]              | Risk ratio                                    | Yes<br>No                                                          | Highest-risk quintile<br>Lowest-risk quintile | RR = 2.29 (95% CI = 1.73, 2.96)<br>Reference                                                       |                 |                                |
|                                               | (1–6 months)   | Goshen 2017 [16] <sup>1</sup> | Risk ratio                                    | Yes, n = 936<br>No, n = 28491                                      | Highest-risk quintile<br>Lowest-risk quintile | RR = 2.03 (95% CI = 1.82, 2.35)<br>Reference                                                       | <0.0001         |                                |
|                                               |                | Females                       | Goshen 2017 [16]                              | T-test                                                             | Yes, n = 819                                  |                                                                                                    |                 | Mean = 4.33 10 <sup>9</sup> /L |
|                                               |                |                               | (1–6 months)                                  |                                                                    | No, n = 26239                                 |                                                                                                    |                 | Mean = 3.7 10 <sup>9</sup> /L  |
| Goshen 2017 [16]                              | Risk ratio     | Yes<br>No                     | Highest-risk quintile<br>Lowest-risk quintile | RR = 1.99 (95% CI = 1.63, 2.65)<br>Reference                       |                                               |                                                                                                    |                 |                                |

---

**6 < outcome time window ≤ 12 months:**


---

|    |          |                 |            |               |                               |                                 |
|----|----------|-----------------|------------|---------------|-------------------------------|---------------------------------|
| UK | Everyone | Boursi 2016 [8] | Odds ratio | Yes, n = 4929 | <i>Modelled as continuous</i> | OR = 1.24 (95% CI = 1.21, 1.27) |
|    |          | (1 year)        |            | No, n = 11311 |                               |                                 |

---

Abbreviations: CRC = colorectal cancer, OR = odds ratio, RR = risk ratio. <sup>1</sup>Multivariable effect estimate, adjusted for: haemoglobin, mean corpuscular volume, platelets, red blood cell distribution width, alanine aminotransferase, protein, iron, ferritin



**Table S67:** Neutrophil proportion for colorectal cancer

| Country                                       | Strata          | Article                       | Analysis type  | CRC outcome groups and no. per group | Median per outcome group | <i>p</i> -value |
|-----------------------------------------------|-----------------|-------------------------------|----------------|--------------------------------------|--------------------------|-----------------|
| <b>0 &lt; outcome time window ≤ 6 months:</b> |                 |                               |                |                                      |                          |                 |
| China                                         | Everyone        | Zhou 2017 [52] (At diagnosis) | Mann-Whitney U | Yes, n = 242                         | Median = 66.50%          | <0.001          |
|                                               |                 |                               |                | No, n = 262                          | Median = 56.75%          |                 |
|                                               |                 | Zhou 2017 [52] (At diagnosis) | Mann-Whitney U | Yes, n = 242                         | Median = 66.50%          | <0.001          |
|                                               |                 |                               |                | Polyp, n = 248                       | Median = 58.15%          |                 |
|                                               |                 | Zhou 2017 [52] (At diagnosis) | Kruskal-Wallis | Yes, n = 242                         | Median = 66.50%          | <0.001          |
|                                               |                 |                               |                | Polyp, n = 248                       | Median = 58.15%          |                 |
| No, n = 262                                   | Median = 56.75% |                               |                |                                      |                          |                 |

Abbreviations: CRC = colorectal cancer

**Table S78:** Combined components for colorectal cancer, with analyses sorted by outcome time window, country, and strata

| Country                                       | Strata   | Article                        | Analysis type               | CRC outcome groups and no. per group   | Combined component                                 | Blood level categories and no. per group | Analysis estimates               | <i>p</i> -value |
|-----------------------------------------------|----------|--------------------------------|-----------------------------|----------------------------------------|----------------------------------------------------|------------------------------------------|----------------------------------|-----------------|
| <b>0 &lt; outcome time window ≤ 6 months:</b> |          |                                |                             |                                        |                                                    |                                          |                                  |                 |
| China                                         | Everyone | Huang 2019 [25] (At admission) | T-test                      | Yes                                    | Red blood cell distribution width-lymphocyte ratio |                                          | Mean = 8.21                      | <0.05           |
|                                               |          | No                             |                             | Mean = 7.2                             |                                                    |                                          |                                  |                 |
|                                               |          | Huang 2019 [25] (At admission) | T-test                      | Yes                                    | Red blood cell distribution width-lymphocyte ratio |                                          | Mean = 8.21                      | ≥0.05           |
|                                               |          | Polyp                          |                             | Mean = 7.59                            |                                                    |                                          |                                  |                 |
|                                               |          | Huang 2019 [25] (At admission) | ROC                         | Yes                                    | Red blood cell distribution width-lymphocyte ratio | 8.91 cut-off                             | AUC = 0.57 (95% CI = 0.73, 0.83) |                 |
|                                               |          | No                             |                             | Sensitivity = 41%<br>Specificity = 72% |                                                    |                                          |                                  |                 |
|                                               |          | Wu 2019 [50] (At diagnosis)    | T-test                      | Yes                                    | Mean platelet volume-platelet ratio                |                                          | Mean = 0.0330                    | <0.05           |
|                                               |          | No                             |                             | Mean = 0.0447                          |                                                    |                                          |                                  |                 |
|                                               |          | Wu 2019 [50] (At diagnosis)    | T-test                      | Yes                                    | Mean platelet volume-platelet ratio                |                                          | Mean = 0.0330                    | <0.05           |
|                                               |          | Polyp                          |                             | Mean = 0.0411                          |                                                    |                                          |                                  |                 |
|                                               |          | Wu 2019 [50] (At diagnosis)    | ANOVA                       | Yes                                    | Mean platelet volume-platelet ratio                |                                          | Mean = 0.0330                    | <0.001          |
|                                               |          | Polyp                          |                             | Mean = 0.0411                          |                                                    |                                          |                                  |                 |
|                                               |          | Healthy                        |                             | Mean = 0.0447                          |                                                    |                                          |                                  |                 |
|                                               |          | Wu 2019 [50] (At diagnosis)    | ROC                         | Yes                                    | Mean platelet volume-platelet ratio                |                                          | AUC = 0.81 (95% CI = 0.76, 0.86) |                 |
|                                               |          | No                             |                             |                                        |                                                    |                                          |                                  |                 |
| Wu 2019 [50] (At diagnosis)                   | T-test   | Yes                            | Neutrophil-lymphocyte ratio |                                        | Mean = 1.98                                        | <0.05                                    |                                  |                 |
| No                                            |          | Mean = 1.57                    |                             |                                        |                                                    |                                          |                                  |                 |
| Wu 2019 [50] (At diagnosis)                   | T-test   | Yes                            | Neutrophil-lymphocyte ratio |                                        | Mean = 1.98                                        | <0.05                                    |                                  |                 |
| Polyp                                         |          | Mean = 1.67                    |                             |                                        |                                                    |                                          |                                  |                 |
| Wu 2019 [50] (At diagnosis)                   | ANOVA    | Yes                            | Neutrophil-lymphocyte ratio |                                        | Mean = 1.98                                        | <0.001                                   |                                  |                 |
| Polyp                                         |          | Mean = 1.67                    |                             |                                        |                                                    |                                          |                                  |                 |
| Healthy                                       |          | Mean = 1.57                    |                             |                                        |                                                    |                                          |                                  |                 |
| Wu 2019 [50] (At diagnosis)                   | ROC      | Yes                            | Neutrophil-lymphocyte ratio |                                        | AUC = 0.67 (95% CI = 0.62, 0.73)                   |                                          |                                  |                 |
| No                                            |          |                                |                             |                                        |                                                    |                                          |                                  |                 |
| Wu 2019 [50] (At diagnosis)                   | T-test   | Yes                            | Platelet-lymphocyte ratio   |                                        | Mean = 140.26                                      | <0.05                                    |                                  |                 |
| No                                            |          | Mean = 94.55                   |                             |                                        |                                                    |                                          |                                  |                 |

|                                  |                |                         |                                         |              |                                                    |        |
|----------------------------------|----------------|-------------------------|-----------------------------------------|--------------|----------------------------------------------------|--------|
| Wu 2019 [50]<br>(At diagnosis)   | T-test         | Yes<br>Polyp            | Platelet-lymphocyte ratio               |              | Mean = 140.26<br>Mean = 113.03                     | <0.05  |
| Wu 2019 [50]<br>(At diagnosis)   | ANOVA          | Yes<br>Polyp<br>Healthy | Platelet-lymphocyte ratio               |              | Mean = 140.26<br>Mean = 113.03<br>Mean = 94.55     | <0.001 |
| Wu 2019 [50]<br>(At diagnosis)   | ROC            | Yes<br>No               | Platelet-lymphocyte ratio               |              | AUC = 0.78 (95% CI = 0.73, 0.82)                   |        |
| Yang 2018 [51]<br>(At admission) | Mann-Whitney U | Yes<br>Polyp            | Neutrophil-lymphocyte ratio             |              | Median = 2.08<br>Median = 1.87                     | 0.091  |
| Yang 2018 [51]<br>(At admission) | Mann-Whitney U | Yes<br>Polyp            | Platelet-lymphocyte ratio               |              | Median = 124.48<br>Median = 113.19                 | 0.059  |
| Zhou 2017 [52]<br>(At diagnosis) | Mann-Whitney U | Yes<br>No               | Neutrophil-white blood cell count ratio |              | Median = 66.50<br>Median = 58.15                   | <0.001 |
| Zhou 2017 [52]<br>(At diagnosis) | Mann-Whitney U | Yes<br>Polyp            | Neutrophil-white blood cell count ratio |              | Median = 66.50<br>Median = 58.15                   | <0.001 |
| Zhou 2017 [52]<br>(At diagnosis) | Kruskal-Wallis | Yes<br>Polyp<br>Healthy | Neutrophil-white blood cell count ratio |              | Median = 66.50<br>Median = 58.15<br>Median = 58.15 | <0.001 |
| Zhou 2017 [52]<br>(At diagnosis) | Mann-Whitney U | Yes<br>Polyp            | Neutrophil-white blood cell count ratio |              | Median = 23.95<br>Median = 31.50                   | <0.001 |
| Zhou 2017 [52]<br>(At diagnosis) | Mann-Whitney U | Yes<br>Healthy          | Neutrophil-white blood cell count ratio |              | Median = 23.95<br>Median = 35.15                   | <0.001 |
| Zhou 2017 [52]<br>(At diagnosis) | Kruskal-Wallis | Yes<br>Polyp<br>Healthy | Neutrophil-white blood cell count ratio |              | Median = 23.95<br>Median = 31.50<br>Median = 35.15 | <0.001 |
| Zhou 2017 [52]<br>(At diagnosis) | Mann-Whitney U | Yes<br>No               | Neutrophil-lymphocyte ratio             |              | Median = 2.76<br>Median = 1.60                     | <0.001 |
| Zhou 2017 [52]<br>(At diagnosis) | Mann-Whitney U | Yes<br>Polyp            | Neutrophil-lymphocyte ratio             |              | Median = 2.76<br>Median = 1.875                    | <0.001 |
| Zhou 2017 [52]<br>(At diagnosis) | Kruskal-Wallis | Yes<br>Polyp<br>Healthy | Neutrophil-lymphocyte ratio             |              | Median = 2.76<br>Median = 1.875<br>Median = 1.60   | <0.001 |
| Zhou 2017 [52]<br>(At diagnosis) | ROC            | Yes<br>No               | Neutrophil-lymphocyte ratio             | 2.33 cut-off | Sensitivity = 66.9%<br>Specificity = 77.6%         |        |

|        |                                       |                                          |                           |                           |                             |                                                                |                                        |                                        |        |
|--------|---------------------------------------|------------------------------------------|---------------------------|---------------------------|-----------------------------|----------------------------------------------------------------|----------------------------------------|----------------------------------------|--------|
| Turkey | Everyone                              | Cakmak 2017 [9]<br>(6 months)            | T-test                    | Yes                       | Neutrophil-lymphocyte ratio |                                                                | Mean = 2.9                             | <0.001                                 |        |
|        |                                       |                                          |                           | No                        |                             |                                                                | Mean = 2.0                             |                                        |        |
|        |                                       | Cakmak 2017 [9]<br>(6 months)            | ROC                       | Yes                       | Neutrophil-lymphocyte ratio | 2.05 cut-off                                                   | AUC = 0.740                            | Sensitivity = 78%<br>Specificity = 66% |        |
|        |                                       |                                          |                           | No                        |                             |                                                                |                                        |                                        |        |
|        |                                       | Cakmak 2017 [9]<br>(6 months)            | T-test                    | Yes                       | Platelet-lymphocyte ratio   |                                                                | Mean = 163.6                           | <0.001                                 |        |
|        |                                       |                                          |                           | No                        |                             |                                                                | Mean = 118.5                           |                                        |        |
|        | Cakmak 2017 [9]<br>(6 months)         | ROC                                      | Yes                       | Platelet-lymphocyte ratio | 130 cut-off                 | AUC = 0.702                                                    | Sensitivity = 65%<br>Specificity = 72% |                                        |        |
|        |                                       |                                          | No                        |                           |                             |                                                                |                                        |                                        |        |
|        | Kilincalp 2015 [28]<br>(At diagnosis) | Everyone                                 | [28]                      | T-test                    | Yes                         | Neutrophil-lymphocyte ratio                                    |                                        | Mean = 6.1                             | <0.001 |
|        |                                       |                                          |                           |                           | No                          |                                                                |                                        | Mean = 1.5                             |        |
|        |                                       | [28]                                     | ROC                       | Yes                       | Neutrophil-lymphocyte ratio | 2.02 cut-off                                                   | AUC = 0.921                            | Sensitivity = 86%<br>Specificity = 84% |        |
|        |                                       |                                          |                           | No                        |                             |                                                                |                                        |                                        |        |
| [28]   |                                       | T-test                                   | Yes                       | Platelet-lymphocyte ratio |                             | Mean = 230.5                                                   | <0.001                                 |                                        |        |
|        |                                       |                                          | No                        |                           |                             | Mean = 106.3                                                   |                                        |                                        |        |
| [28]   | ROC                                   | Yes                                      | Platelet-lymphocyte ratio | 135 cut-off               | AUC = 0.854                 | Sensitivity = 70%<br>Specificity = 90%                         |                                        |                                        |        |
|        |                                       | No                                       |                           |                           |                             |                                                                |                                        |                                        |        |
| UK     | Everyone                              | Boursi 2016 [8]<br>(1 year)              | Odds ratio                | Yes                       | Neutrophil-lymphocyte ratio | <i>Modelled as continuous</i>                                  | OR = 1.21 (95% CI = 1.18, 1.24)        | <0.001                                 |        |
|        |                                       |                                          |                           | No                        |                             |                                                                |                                        |                                        |        |
|        |                                       | Boursi 2016 [8] <sup>1</sup><br>(1 year) | Odds ratio                | Yes                       | Neutrophil-lymphocyte ratio | <i>Modelled as fractional polynomials (powers: -0.5, -0.5)</i> | OR = 0.11*NLR <sup>-0.5</sup>          | OR = 0.70*NLR <sup>0.5</sup> × ln(NLR) |        |
|        |                                       | No                                       |                           |                           |                             |                                                                |                                        |                                        |        |
|        |                                       | Boursi 2016 [8] <sup>2</sup><br>(1 year) | Odds ratio                | Yes                       | Neutrophil-lymphocyte ratio | <i>Modelled as fractional polynomials (powers: -0.5, -0.5)</i> | OR = 0.31*NLR <sup>-0.5</sup>          | OR = 0.77*NLR <sup>0.5</sup> × ln(NLR) |        |
|        |                                       |                                          |                           | No                        |                             |                                                                |                                        |                                        |        |

6 < outcome time window ≤ 12 months:

|    |          |                                            |                 |           |                                       |                                                 |  |                                              |                                 |
|----|----------|--------------------------------------------|-----------------|-----------|---------------------------------------|-------------------------------------------------|--|----------------------------------------------|---------------------------------|
| UK | Centre A | Panagiotopoulou<br>2014 [38]<br>(3 months) | Chi-<br>squared | Yes<br>No | Mean platelet volume &<br>haemoglobin | MCV <80 fL & anaemia<br>MCV ≥80 fL & no anaemia |  | 0.285                                        |                                 |
|    |          | Panagiotopoulou<br>2014 [38]<br>(3 months) | Chi-<br>squared | Yes<br>No |                                       | Mean platelet volume &<br>haemoglobin           |  | MCV <80 fL & anaemia<br>MCV ≥80 fL & anaemia | 0.781                           |
|    |          | Panagiotopoulou<br>2014 [38]<br>(3 months) | Odds ratio      | Yes<br>No |                                       | Mean platelet volume &<br>haemoglobin           |  | MCV <80 fL & anaemia<br>MCV ≥80 fL & anaemia | OR = 1.3 (95% CI =<br>0.5, 3.9) |
|    | Centre B | Panagiotopoulou<br>2014 [38]<br>(3 months) | Chi-<br>squared | Yes<br>No | Mean platelet volume &<br>haemoglobin | MCV <80 fL & anaemia<br>MCV ≥80 fL & no anaemia |  | 0.285                                        |                                 |
|    |          | Panagiotopoulou<br>2014 [38]<br>(3 months) | Chi-<br>squared | Yes<br>No | Mean platelet volume &<br>haemoglobin | MCV <80 fL & anaemia<br>MCV ≥80 fL & anaemia    |  | 0.196                                        |                                 |
|    |          | Panagiotopoulou<br>2014 [38]<br>(3 months) | Odds ratio      | Yes<br>No | Mean platelet volume &<br>haemoglobin | MCV <80 fL & anaemia<br>MCV ≥80 fL & anaemia    |  | OR = 1.6 (95% CI =<br>0.8, 3.3)              |                                 |
|    |          | Panagiotopoulou<br>2014 [38]<br>(3 months) | Odds ratio      | Yes<br>No | Mean platelet volume &<br>haemoglobin | MCV <80 fL & anaemia<br>MCV ≥80 fL & anaemia    |  | OR = 1.6 (95% CI =<br>0.8, 3.3)              |                                 |

Abbreviations: CRC = colorectal cancer, OR = odds ratio, RR = risk ratio, NLR = Neutrophil-lymphocyte ratio, ROC = receiver operating characteristic, AUC = area under the curve, MPV = mean platelet volume. <sup>1</sup>Multivariable effect estimate, adjusted for: haematocrit, mean corpuscular volume, lymphocyte count. <sup>2</sup>Multivariable effect estimate, adjusted for: haemoglobin, mean corpuscular volume, white blood cell count, platelets, sex, previous metformin prescriptions, previous prescriptions for oral hypoglycemic drugs other than metformin.

#### 4. Performance statistics from model validation studies

**Table S89:** Performance statistics from internal (n = 9) and external (n = 11) validation models.

| Article                 | Model name/description     | Primary outcome window | No. cases | No. controls | Discrimination: AUC (95% CI) | Calibration               |
|-------------------------|----------------------------|------------------------|-----------|--------------|------------------------------|---------------------------|
| Internal validation:    |                            |                        |           |              |                              |                           |
| Boursi 2016 [8]         | Laboratory model           | 1 year                 |           |              | 0.77 (0.75, 0.78)            |                           |
| Boursi 2016 [8]         | Combined model             | 1 year                 | 1702      | 3324         | 0.73 (0.71, 0.74)            | Calibration plot          |
| Firat 2016 [14]         |                            | At diagnosis           |           |              | 0.81                         |                           |
| Hippisley-Cox 2012 [21] | QCancer Colorectal males   | 2 years                |           |              | 0.91 (0.90, 0.91)            | Calibration plot          |
| Hippisley-Cox 2012 [21] | QCancer Colorectal females | 2 years                |           |              | 0.89 (0.88, 0.90)            | Calibration plot          |
| Hippisley-Cox 2013 [22] | QCancer males              | 2 years                | 125       | 667261       | 0.90 (0.90, 0.91)            | Calibration plot          |
| Hippisley-Cox 2013 [23] | QCancer females            | 2 years                | 1356      | 655311       | 0.89 (0.88, 0.90)            | Calibration plot          |
| Kinar 2016 [29]         | ColonFlag                  | 0–1 month              |           |              | 0.84 (0.81, 0.86)            | Hosmer-Lemeshow: p = 0.47 |
|                         |                            | 3–6 months             | 698       |              | 0.82 (0.79, 0.84)            |                           |
|                         |                            | 22–24 months           |           |              | 0.72 (0.69, 0.75)            |                           |
| Thompson 2017 [48]      |                            | 3 years                | 636       | 10966        | 0.86 (0.84, 0.87)            | Calibration plot          |
| External validation:    |                            |                        |           |              |                              |                           |
| Ayling 2019 [4]         | ColonFlag                  |                        | 21        | 571          |                              |                           |
| Birks 2017 [7]          | ColonFlag                  | 3–6 months             | 5935      | 2478764      | 0.84 (0.84, 0.85)            |                           |
|                         |                            | 6–12 months            | 6821      | 2429503      | 0.81 (0.81, 0.82)            |                           |
|                         |                            | 12–24 months           | 5744      | 2328636      | 0.79 (0.79, 0.80)            |                           |
|                         |                            | 18–24 months           | 5141      | 2220108      | 0.78 (0.78, 0.78)            |                           |
|                         |                            | 24–36 months           | 7360      | 2102947      | 0.75 (0.75, 0.76)            |                           |
| Collins 2012 [10]       | QCancer Colorectal males   | 2 years                | 2036      | 1057729      | 0.92 (0.91, 0.92)            | Calibration plot          |
| Collins 2012 [10]       | QCancer Colorectal females | 2 years                | 1676      | 1074099      | 0.91 (0.90, 0.92)            | Calibration plot          |

|                     |                    |            |      |        |                   |                            |
|---------------------|--------------------|------------|------|--------|-------------------|----------------------------|
| Cubiella 2016 [12]  | COLONPREDICT       | 1 week     | 136  | 1345   | 0.92 (0.90, 0.94) |                            |
| Hilsden 2018 [20]   | ColonFlag          | 1 year     | 60   | 8704   |                   |                            |
| Hornbrook 2017 [24] | ColonFlag          | 6 months   | 900  | 16195  | 0.80 (0.79, 0.82) |                            |
| Kinar 2016 [29]     | ColonFlag          | 0–1 month  |      |        | 0.84 (0.82, 0.86) | Hosmer-Lemeshow: p < 0.001 |
|                     |                    | 3–6 months | 5061 | 20552  | 0.81 (0.80, 0.83) |                            |
| Kinar 2017 [30]     | ColonFlag          | 18 months  | 133  | 112451 |                   |                            |
| Marshall 2011 [34]  | Bristol-Birmingham | 2 years    | 349  | 1744   | 0.92 (0.91, 0.94) |                            |
| Marshall 2011 [34]  | CAPER <sup>1</sup> | 2 years    | 5477 | 38314  | 0.79 (0.77, 0.80) |                            |

<sup>1</sup>The CAPER model was developed study by Hamilton and includes haemoglobin level as a predictor, but was not included in this review because it was never published, instead only a conference abstract was available [54].

## References

1. Acher, P.L.; Al-Mishlab, T.; Rahman, M.; Bates, T. Iron-deficiency anaemia and delay in the diagnosis of colorectal cancer. *Colorectal Dis.* **2003**, *5*, 145–148, doi:10.1046/j.1463-1318.2003.00415.x.
2. Ankus, E.; Price, S.J.; Ukoumunne, O.C.; Hamilton, W.; Bailey, S.E.R. Cancer incidence in patients with a high normal platelet count: A cohort study using primary care data. *Fam. Pract.* **2018**, *35*, 671–675, doi:10.1093/fampra/cmy018.
3. Ay, S.; Eryilmaz, M.A.; Aksoy, N.; Okus, A.; Unlu, Y.; Sevinc, B. Is early detection of colon cancer possible with red blood cell distribution width? *Asian Pac. J. Cancer Prev.* **2015**, *16*, 753–756.
4. Ayling, R.M.; Lewis, S.J.; Cotter, F. Potential roles of artificial intelligence learning and faecal immunochemical testing for prioritisation of colonoscopy in anaemia. *Br. J. Haematol.* **2019**, *185*, 311–316, doi:10.1111/bjh.15776.
5. Bafandeh, Y.; Khoshbaten, M.; Sadat, A.T.E.; Farhang, S. Clinical predictors of colorectal polyps and carcinoma in a low prevalence region: Results of a colonoscopy based study. *World J. Gastroenterol.* **2008**, *14*, 1534–1538, doi:10.3748/wjg.14.1534.
6. Bailey, S.E.R.; Ukoumunne, O.C.; Shephard, E.A.; Hamilton, W. Clinical relevance of thrombocytosis in primary care: A prospective cohort study of cancer incidence using English electronic medical records and cancer registry data. *Br. J. Gen. Pract.* **2017**, *67*, e405–e413, doi:10.3399/bjgp17X691109.
7. Birks, J.; Bankhead, C.; Holt, T.A.; Fuller, A.; Patnick, J. Evaluation of a prediction model for colorectal cancer: retrospective analysis of 2.5 million patient records. *Cancer Med.* **2017**, *6*, 2453–2460, doi:10.1002/cam4.1183.
8. Boursi, B.; Mamtani, R.; Hwang, W.T.; Haynes, K.; Yang, Y.X. A Risk Prediction Model for Sporadic CRC Based on Routine Lab Results. *Dig. Dis. Sci.* **2016**, *61*, 2076–2086, doi:10.1007/s10620-016-4081-x.
9. Cakmak, E.; Soyly, S.; Yonem, O.; Yilmaz, A. Neutrophil-to-lymphocyte ratio, platelet-to-lymphocyte ratio, and red blood cell distribution width as new biomarkers in patients with colorectal cancer. *Erciyes Med. J.* **2017**, *39*, 131–136, doi:10.5152/etd.2017.0051.
10. Collins, G.S.; Altman, D.G. Identifying patients with undetected colorectal cancer: An independent validation of QCancer (Colorectal). *Br. J. Cancer* **2012**, *107*, 260–265, doi:10.1038/bjc.2012.266.

11. Cross, A.J.; Wooldrage, K.; Robbins, E.C.; Pack, K.; Brown, J.P.; Hamilton, W.; Thompson, M.R.; Flashman, K.G.; Halligan, S.; Thomas-Gibson, S., et al. Whole-colon investigation vs. flexible sigmoidoscopy for suspected colorectal cancer based on presenting symptoms and signs: a multicentre cohort study. *Br. J. Cancer* **2019**, *120*, 154–164, doi:10.1038/s41416-018-0335-z.
12. Cubiella, J.; Vega, P.; Salve, M.; Diaz-Ondina, M.; Alves, M.T.; Quintero, E.; Alvarez-Sanchez, V.; Fernandez-Banares, F.; Boadas, J.; Campo, R., et al. Development and external validation of a faecal immunochemical test-based prediction model for colorectal cancer detection in symptomatic patients. *BMC Med.* **2016**, *14*, s12916–s016.
13. Fijten, G.H.; Starmans, R.; Muris, J.W.; Schouten, H.J.; Blijham, G.H.; Knottnerus, J.A. Predictive value of signs and symptoms for colorectal cancer in patients with rectal bleeding in general practice. *Fam. Pract.* **1995**, *12*, 279–286.
14. Firat, F.; Arslan, A.K.; Colak, C.; Harputluoglu, H. Estimation of risk factors associated with colorectal cancer: an application of knowledge discovery in databases. *Kuwait J. Sci.* **2016**, *43*, 151–161.
15. Goldshtein, I.; Neeman, U.; Chodick, G.; Shalev, V. Variations in hemoglobin before colorectal cancer diagnosis. *Eur. J. Cancer Prev.* **2010**, *19*, 342–344, doi:10.1097/CEJ.0b013e32833c1be0.
16. Goshen, R.; Mizrahi, B.; Akiva, P.; Kinar, Y.; Choman, E.; Shalev, V.; Sopik, V.; Kariv, R.; Narod, S.A. Predicting the presence of colon cancer in members of a health maintenance organisation by evaluating analytes from standard laboratory records. *Br. J. Cancer* **2017**, *116*, 944–950, doi:10.1038/bjc.2017.53.
17. Hamilton, W.; Round, A.; Sharp, D.; Peters, T.J. Clinical features of colorectal cancer before diagnosis: A population-based case-control study. *Br. J. Cancer* **2005**, *93*, 399–405, doi:10.1038/sj.bjc.6602714.
18. Hamilton, W.; Lancashire, R.; Sharp, D.; Peters, T.J.; Cheng, K.K.; Marshall, T. The importance of anaemia in diagnosing colorectal cancer: a case-control study using electronic primary care records. *Br. J. Cancer* **2008**, *98*, 323–327, doi:10.1038/sj.bjc.6604165.
19. Hamilton, W.; Lancashire, R.; Sharp, D.; Peters, T.J.; Cheng, K.K.; Marshall, T. The risk of colorectal cancer with symptoms at different ages and between the sexes: A case-control study. *BMC Med.* **2009**, *7*, doi:10.1186/1741-7015-7-17.
20. Hilsden, R.J.; Heitman, S.J.; Mizrahi, B.; Narod, S.A.; Goshen, R. Prediction of findings at screening colonoscopy using a machine learning algorithm based on complete blood counts (ColonFlag). *PLoS ONE* **2018**, *13*, doi:10.1371/journal.pone.0207848.
21. Hippisley-Cox, J.; Coupland, C. Identifying patients with suspected colorectal cancer in primary care: Derivation and validation of an algorithm. *Br. J. Gen. Pract.* **2012**, *62*, e29–e37, doi:10.3399/bjgp12X616346.
22. Hippisley-Cox, J.; Coupland, C. Symptoms and risk factors to identify men with suspected cancer in primary care: Derivation and validation of an algorithm. *Br. J. Gen. Pract.* **2013**, *63*, e1–e10, doi:10.3399/bjgp13X660724.
23. Hippisley-Cox, J.; Coupland, C. Symptoms and risk factors to identify women with suspected cancer in primary care: Derivation and validation of an algorithm. *Br. J. Gen. Pract.* **2013**, *63*, e11–e21, doi:10.3399/bjgp13X660733.
24. Hornbrook, M.C.; Goshen, R.; Choman, E.; O'Keeffe-Rosetti, M.; Kinar, Y.; Liles, E.G.; Rust, K.C. Early Colorectal Cancer Detected by Machine Learning Model Using Gender, Age, and Complete Blood Count Data. *Dig. Dis. Sci.* **2017**, *62*, 2719–2727, doi:10.1007/s10620-017-4722-8.
25. Huang, J.; Zhao, Y.; Liao, L.; Liu, S.; Lu, S.; Wu, C.; Wei, C.; Xu, S.; Zhong, H.; Liu, J., et al. Evaluation of Red Cell Distribution Width to Lymphocyte Ratio as Potential Biomarker for Detection of Colorectal Cancer. *Biomed. Res. Int.* **2019**, doi:10.1155/2019/9852782.
26. Hung, N.; Shen, C.C.; Hu, Y.W.; Hu, L.Y.; Yeh, C.M.; Teng, C.J.; Kuan, A.S.; Chen, S.C.; Chen, T.J.; Liu, C.J. Risk of cancer in patients with iron deficiency anemia: A nationwide population-based study. *PLoS ONE* **2015**, *10*, doi:10.1371/journal.pone.0119647.



27. Joosten, E.; Meeuwissen, J.; Vandewinckele, H.; Hiele, M. Iron status and colorectal cancer in symptomatic elderly patients. *Am. J. Med.* **2008**, *121*, 1072–1077, doi:10.1016/j.amjmed.2008.06.039.
28. Kilincalp, S.; Coban, S.; Akinci, H.; Hamamc, M.; Karaahmet, F.; Coskun, Y.; Ustun, Y.; Simsek, Z.; Erarslan, E.; Yuksel, I. Neutrophil/lymphocyte ratio, platelet/lymphocyte ratio, and mean platelet volume as potential biomarkers for early detection and monitoring of colorectal adenocarcinoma. *Eur. J. Cancer Prev.* **2015**, *24*, 328–333, doi:10.1097/CEJ.0000000000000092.
29. Kinar, Y.; Kalkstein, N.; Akiva, P.; Levin, B.; Half, E.E.; Goldshtein, I.; Chodick, G.; Shalev, V. Development and validation of a predictive model for detection of colorectal cancer in primary care by analysis of complete blood counts: A binational retrospective study. *J. Am. Med. Inform. Assoc.* **2016**, *23*, 879–890, doi:10.1093/jamia/ocv195.
30. Kinar, Y.; Akiva, P.; Choman, E.; Kariv, R.; Shalev, V.; Levin, B.; Narod, S.A.; Goshen, R. Performance analysis of a machine learning flagging system used to identify a group of individuals at a high risk for colorectal cancer. *PLoS ONE* **2017**, *12*, doi:10.1371/journal.pone.0171759.
31. Lawrenson, R.; Logie, J.; Marks, C. Risk of colorectal cancer in general practice patients presenting with rectal bleeding, change in bowel habit or anaemia. *Eur. J. Cancer Care* **2006**, *15*, 267–271, doi:10.1111/j.1365-2354.2005.00637.x.
32. Lee, Y.J.; Lee, H.R.; Nam, C.M.; Hwang, U.K.; Jee, S.H. White blood cell count and the risk of colon cancer. *Yonsei Med. J.* **2006**, *47*, 646–656.
33. Margolis, K.L.; Rodabough, R.J.; Thomson, C.A.; Lopez, A.M.; McTiernan, A. Prospective study of leukocyte count as a predictor of incident breast, colorectal, endometrial, and lung cancer and mortality in postmenopausal women. *Arch. Intern. Med.* **2007**, *167*, 1837–1844, doi:10.1001/archinte.167.17.1837.
34. Marshall, T.; Lancashire, R.; Sharp, D.; Peters, T.J.; Cheng, K.K.; Hamilton, W. The diagnostic performance of scoring systems to identify symptomatic colorectal cancer compared to current referral guidance. *Gut* **2011**, *60*, 1242–1248, doi:10.1136/gut.2010.225987.
35. Mashlab, S.; Large, P.; Laing, W.; Ng, O.; D'Auria, M.; Thurston, D.; Thomson, S.; Acheson, A.G.; Humes, D.J.; Banerjee, A., et al. Anaemia as a risk stratification tool for symptomatic patients referred via the two-week wait pathway for colorectal cancer. *Ann. R. Coll. Surg. Engl.* **2018**, *100*, 350–356, doi:10.1308/rcsann.2018.0030.
36. Naef, M.; Buhlmann, M.; Baer, H.U. Small bowel tumors: Diagnosis, therapy and prognostic factors. *Langenbeck's Arch. Surg.* **1999**, *384*, 176–180, doi:10.1007/s004230050188.
37. Nakama, H.; Zhang, B.; Fattah, A.S.; Zhang, X. Colorectal cancer in iron deficiency anemia with a positive result on immunochemical fecal occult blood. *Int. J. Colorectal Dis.* **2000**, *15*, 271–274.
38. Panagiotopoulou, I.G.; Fitzrol, D.; Parker, R.A.; Kuzhively, J.; Luscombe, N.; Wells, A.D.; Menon, M.; Bajwa, F.M.; Watson, M.A. The yield of colorectal cancer among fast track patients with normocytic and microcytic anaemia. *Ann. R. Coll. Surg. Engl.* **2014**, *96*, 289–293, doi:10.1308/003588414x13814021680076.
39. Panzuto, F.; Chiriatti, A.; Bevilacqua, S.; Giovannetti, P.; Russo, G.; Impinna, S.; Pistilli, F.; Capurso, G.; Annibale, B.; Delle Fave, G., et al. Symptom-based approach to colorectal cancer: Survey of primary care physicians in Italy. *Dig. Liver Dis.* **2003**, *35*, 869–875, doi:10.1016/j.dld.2003.07.005.
40. Pilling, L.C.; Atkins, J.L.; Kuchel, G.A.; Ferrucci, L.; Melzer, D. Red cell distribution width and common disease onsets in 240,477 healthy volunteers followed for up to 9 years. *PLoS ONE* **2018**, *13*, 1–12, doi:10.1371/journal.pone.0203504.
41. Prizment, A.E.; Anderson, K.E.; Visvanathan, K.; Folsom, A.R. Association of inflammatory markers with colorectal cancer incidence in the atherosclerosis risk in communities study. *Cancer Epidemiol. Biomark. Prev.* **2011**, *20*, 297–307, doi:10.1158/1055-9965.EPI-10-1146.
42. Raje, D.; Mukhtar, H.; Oshowo, A.; Ingham Clark, C. What proportion of patients referred to secondary care with iron deficiency anemia have colon cancer? *Dis. Colon Rectum* **2007**, *50*, 1211–1214, doi:10.1007/s10350-007-0249-y.
43. Schneider, C.; Bodmer, M.; Jick, S.S.; Meier, C.R. Colorectal cancer and markers of anemia. *Eur. J. Cancer Prev.* **2018**, *27*, 530–538, doi:10.1097/cej.0000000000000397.
44. Shi, C.; Xie, M.; Li, L.; Li, K.; Hu, B.L. The association and diagnostic value of red blood cell distribution width in colorectal cancer. *Med. (Baltim. )* **2019**, *98*, e15560, doi:10.1097/MD.00000000000015560.

45. Song, Y.; Huang, Z.; Kang, Y.; Lin, Z.; Lu, P.; Lin, Q.; Cai, Z.; Cao, Y.; Zhu, X. Clinical Usefulness and Prognostic Value of Red Cell Distribution Width in Colorectal Cancer. *Biomed. Res. Int.* **2018**, <http://dx.doi.org/10.1155/2018/9858943>, 1-7, doi:10.1155/2018/9858943.
46. Spell, D.W.; Jones, D.V., Jr.; Harper, W.F.; David Bessman, J. The value of a complete blood count in predicting cancer of the colon. *Cancer Detect. Prev.* **2004**, *28*, 37–42.
47. Stapley, S.; Peters, T.J.; Sharp, D.; Hamilton, W. The mortality of colorectal cancer in relation to the initial symptom at presentation to primary care and to the duration of symptoms: A cohort study using medical records. *Br. J. Cancer* **2006**, *95*, 1321–1325, doi:10.1038/sj.bjc.6603439.
48. Thompson, M.R.; O'Leary, D.P.; Flashman, K.; Asiimwe, A.; Ellis, B.G.; Senapati, A. Clinical assessment to determine the risk of bowel cancer using Symptoms, Age, Mass and Iron deficiency anaemia (SAMI). *Br. J. Surg.* **2017**, *104*, 1393–1404, doi:10.1002/bjs.10573.
49. Van Boxtel-Wilms, S.J.M.; van Boven, K.; Bor, J.H.H.; Bakx, J.C.; Lucassen, P.; Oskam, S.; van Weel, C. The value of reasons for encounter in early detection of colorectal cancer. *Eur. J. Gen. Pract.* **2016**, *22*, 91–95, doi:10.3109/13814788.2016.1148135.
50. Wu, Y.Y.; Zhang, X.; Qin, Y.Y.; Qin, J.Q.; Lin, F.Q. Mean platelet volume/platelet count ratio in colorectal cancer: a retrospective clinical study. *BMC Cancer* **2019**, *19*, 7, doi:10.1186/s12885-019-5504-9.
51. Yang, D.; Quan, W.; Wu, J.; Ji, X.; Dai, Y.; Xiao, W.; Chew, H.; Sun, Z.; Li, D. The value of red blood cell distribution width in diagnosis of patients with colorectal cancer. *Clin. Chim. Acta* **2018**, *479*, 98–102, doi:10.1016/j.cca.2018.01.022.
52. Zhou, W.W.; Chu, Y.P.; An, G.Y. Significant difference of neutrophil-lymphocyte ratio between colorectal cancer, adenomatous polyp and healthy people. *Eur. Rev. Med. Pharmacol. Sci.* **2017**, *21*, 5386–5391.
53. Zhu, X.J.; Cao, Y.P.; Lu, P.X.; Kang, Y.L.; Lin, Z.; Hao, T.S.; Song, Y.F. Evaluation of platelet indices as diagnostic biomarkers for colorectal cancer. *Sci. Rep.* **2018**, *8*, 7, doi:10.1038/s41598-018-29293-x.
54. Hamilton, W. Derivation of a score for identifying colorectal cancer in primary care. *Gut.* **2007**, *56*(Suppl. II), A49–A50
